# Supplementary material
Source: PubMed Central journal article supplement (PMC6525544)
Supplement: pnas.1818349116.sapp.pdf [file pnas.1818349116.sapp.pdf]

## Supplementary Information for

A complete arsenic-based respiratory cycle in the marine microbial communities of pelagic  
oxygen deficient zones

Jaclyn K. Saunders<sup>1,2\*</sup>, Clara A. Fuchsman<sup>1,3</sup>, Cedar McKay<sup>1</sup>, and Gabrielle Rocap<sup>1\*</sup>

<sup>1</sup>University of Washington, School of Oceanography, Seattle, WA, USA

<sup>2</sup>Present Address: Woods Hole Oceanographic Institution, Woods Hole, MA, USA

<sup>3</sup>Present Address: Horn Point Laboratory, University of Maryland, Cambridge, MD, USA

Gabrielle Rocap

Email: [rocap@uw.edu](mailto:rocap@uw.edu)

Jaclyn K. Saunders

Email: [jsaunders@whoi.edu](mailto:jsaunders@whoi.edu)

### **This PDF file includes:**

Figs. S1 to S7

Tables S1 to S8

References for SI citations

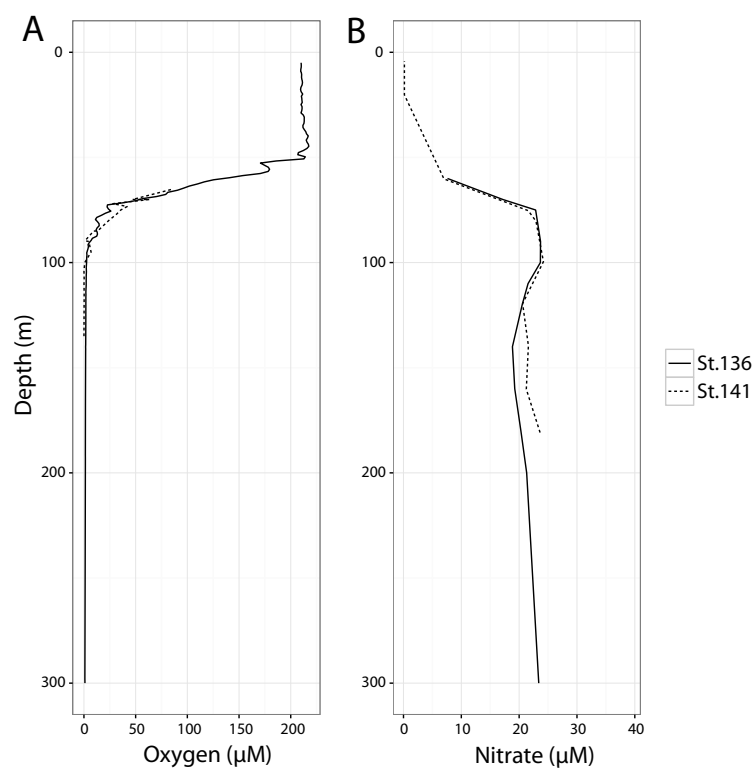

**Fig. S1.** Ancillary data from depth profiles taken at Stations 136 (solid line) & 141 (dashed line) where metagenomic samples were collected. (A) Oxygen concentration. Oxygen decreases sharply from the surface becoming functionally anoxic by 100 m depth. Station 141 oxygen data is from STOX sensor (1); Station 136 oxygen data is from CTD sensor corrected with Winkler Titration. (B) Nitrate concentration (2). Nitrate is depleted in the surface waters, increases to a peak in the oxycline, and decreases where the water column becomes functionally anoxic.

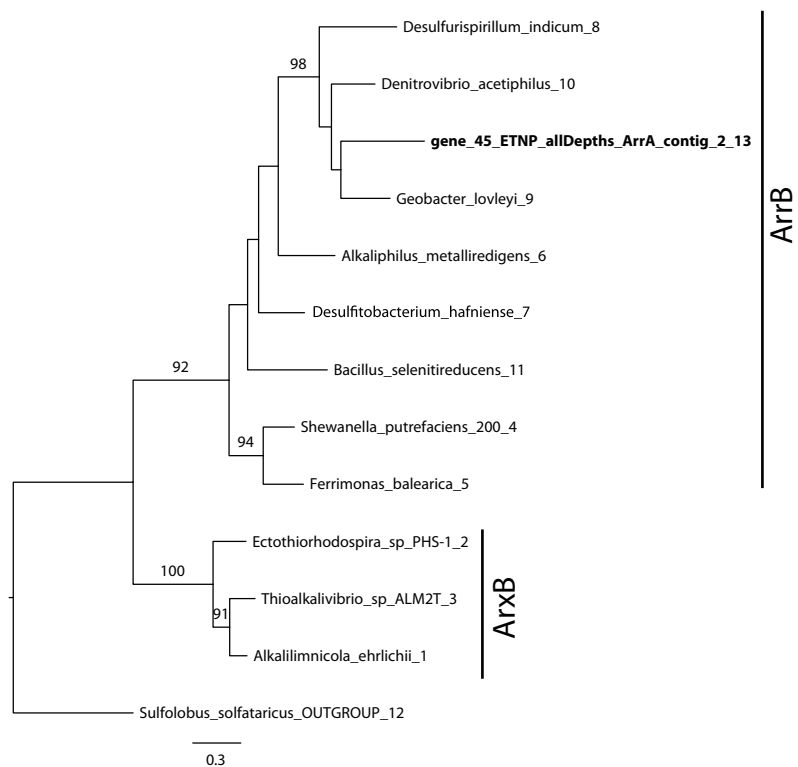

**Fig. S2.** A maximum likelihood tree of the dissimilatory arsenate reductase beta subunit (ArrB) and the closely related arsenite oxidase (ArxB), including a full *de novo* assembled environmental ArrB sequence from the ETNP ODZ metagenome in bold. Bootstrap values  $\geq 70$  are shown. The ETNP ODZ sequence, **gene\_45\_ETNP\_allDepths\_ArrA\_contig\_2**, is more closely related to the known dissimilatory arsenate reductase ArrB sequences. The terminal number on sequence identifiers of the extant nodes of the tree are referred to as tree reference numbers which can be used to find sequence accession numbers in Table S5.

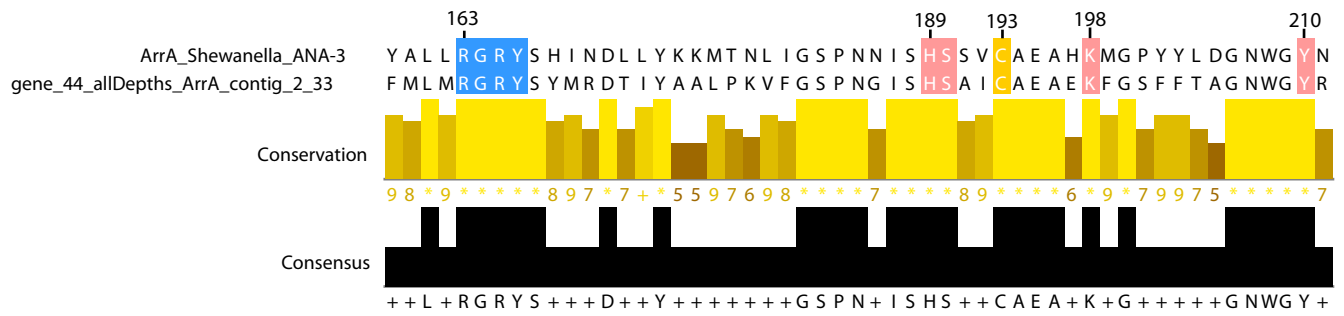

**Fig. S3.** A pairwise alignment of the amino acid sequence of *arrA* from contig *gene\_44\_allDepths\_ArrA\_contig\_2* with the functional dissimilatory arsenate reductase *arrA* from *Shewanella* ANA-3 with integral active site binding motifs and residues highlighted (3).

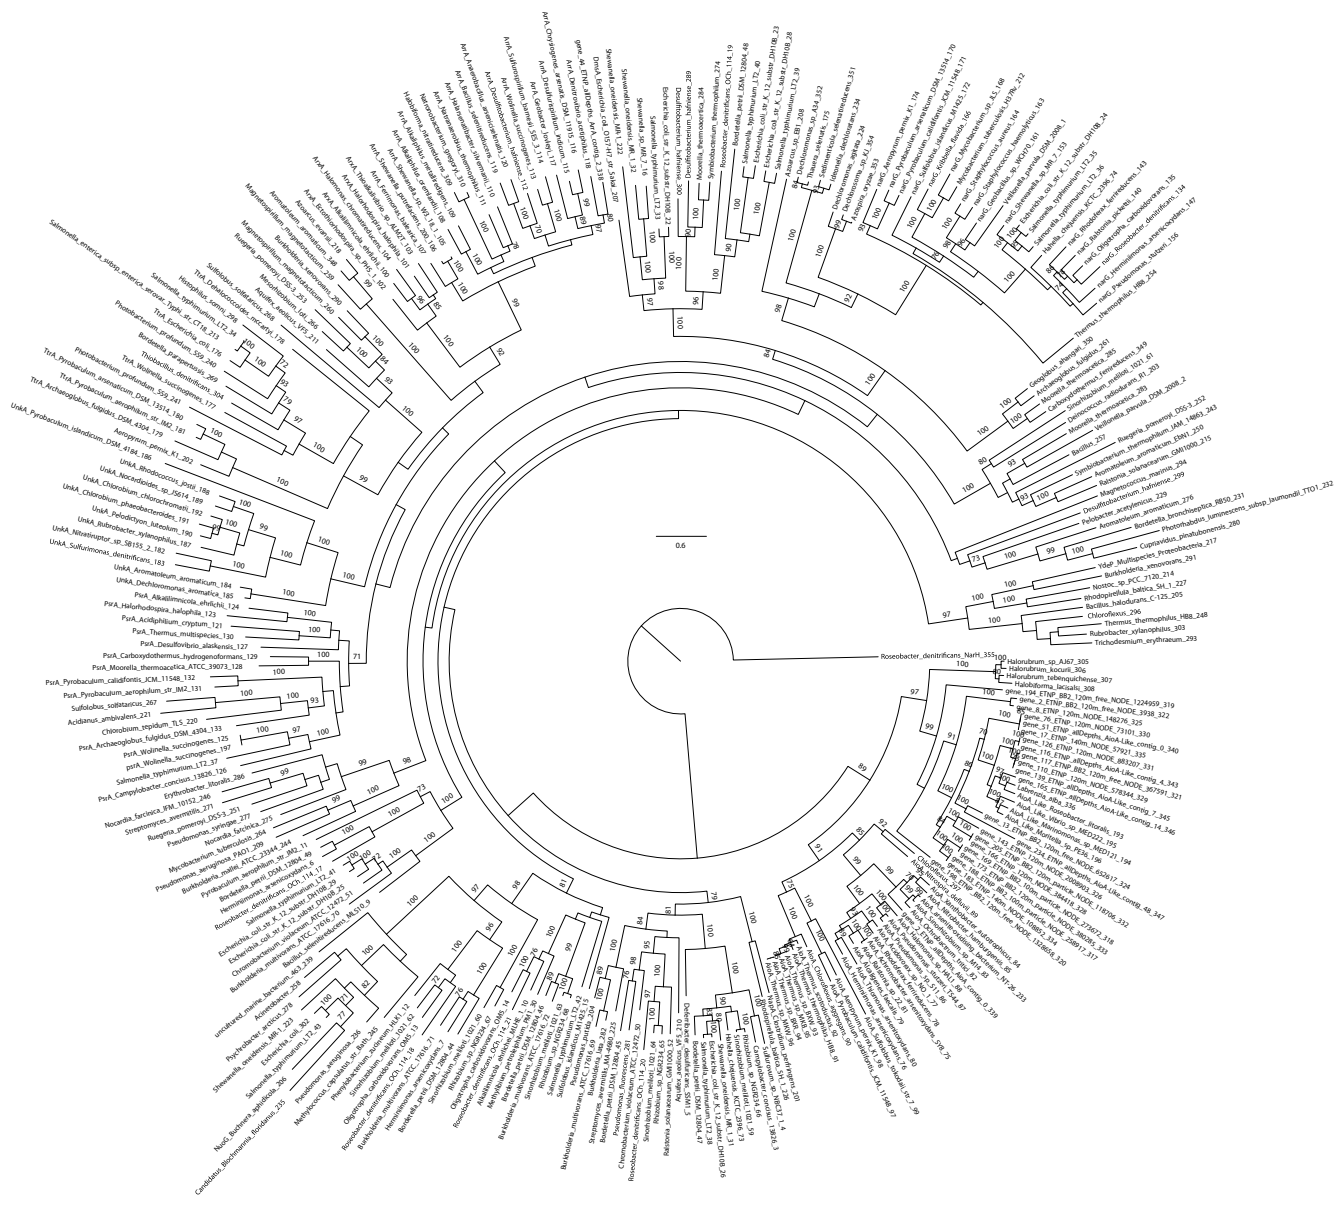

**Fig. S4.** A maximum likelihood tree of the DMSO reductase family constructed with representatives of the major groups within the superfamily including ArrA, ArxA (Fig. 2), AioA, and AioA-Like (Fig. 3). The tree is rooted by a NarH outgroup sequence. Bootstrap values  $\geq 70$  are shown. The terminal number on sequence identifiers of the extant nodes of the tree are referred to as tree reference numbers which can be used to find major clade groupings (Fig. 5) and sequence accession numbers from the lookup table (Table S6).

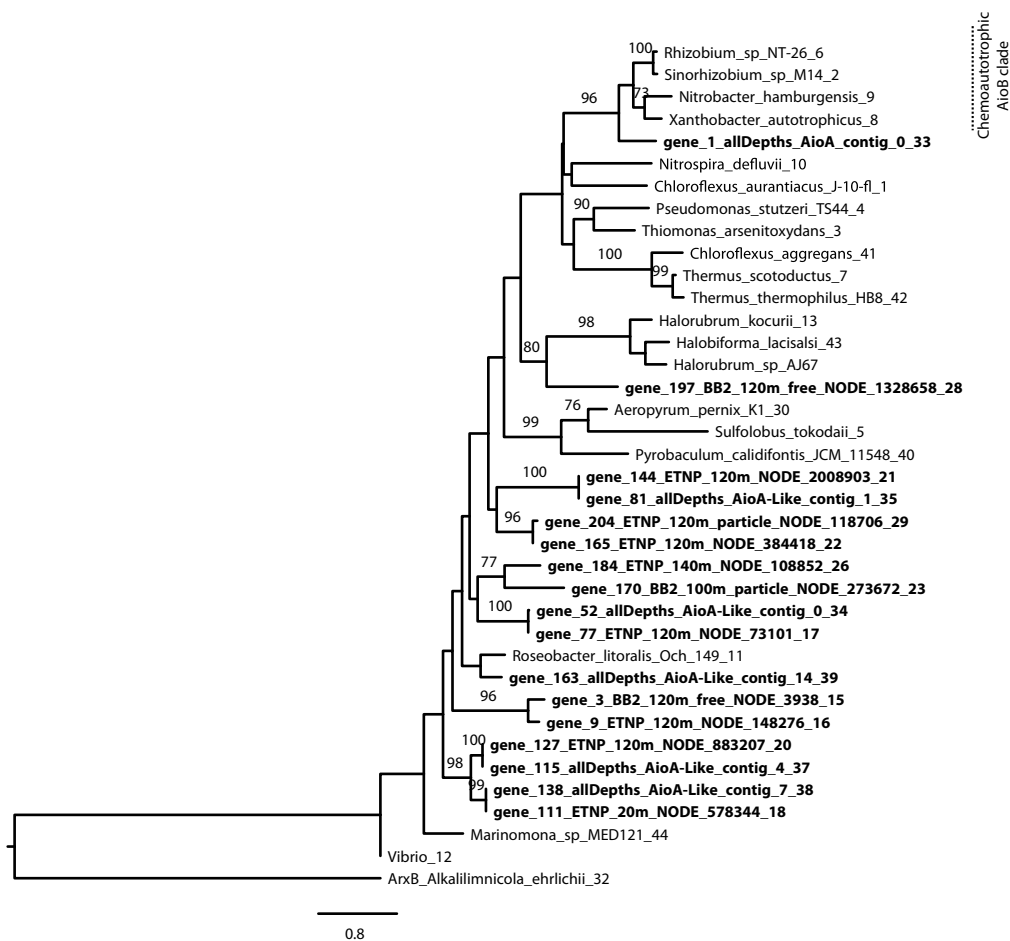

**Fig. S5.** A maximum likelihood tree of the arsenite oxidase beta subunit sequence (AioB) and the closely related arsenite oxidase-like (AioB-Like). Full length *de novo* assembled environmental sequences from the ETNP are denoted by bold text. The clade which contains the AioB sequences associated with chemoautotrophic activity is designated with a dashed bar. ETNP ODZ gene\_1\_ETNP\_allDepths\_AioA\_contig\_0 is most closely related to known dissimilatory arsenite oxidase AioB sequences, and numerous other ETNP metagenomic sequences appear to be AioB-like. Bootstrap values  $\geq 70$  are shown. The terminal number on sequence identifiers of the extant nodes of the tree are referred to as tree reference numbers which can be used to find sequence accession numbers from Table S7.

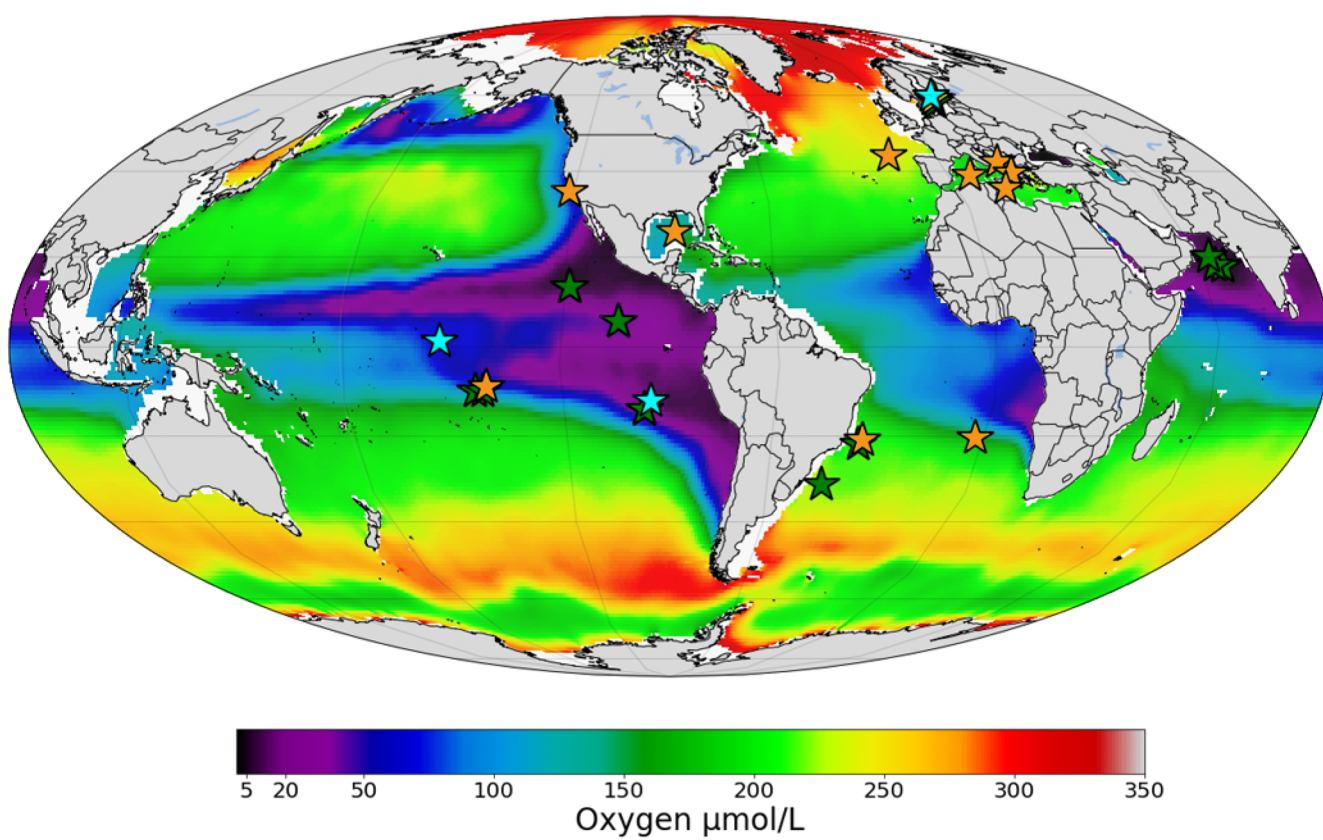

**Fig. S6.** An enlarged map displayed in Fig. 1A showing interpolated oxygen concentrations at 300 m depth from the World Ocean Atlas (4). Stars on the map represent metagenome assemblies where arsenotrophy related genes were identified. Orange stars represent contigs containing *aioA*, green stars represent contigs containing *aioA-like genes*, and cyan stars represent contigs containing *arrA* genes. Green (*aioA-like*) and cyan (*arrA*) are offset by 1 degree above and below the actual locations of the metagenomes, respectively, in order to show the presence of multiple genes at one location (Table S2).

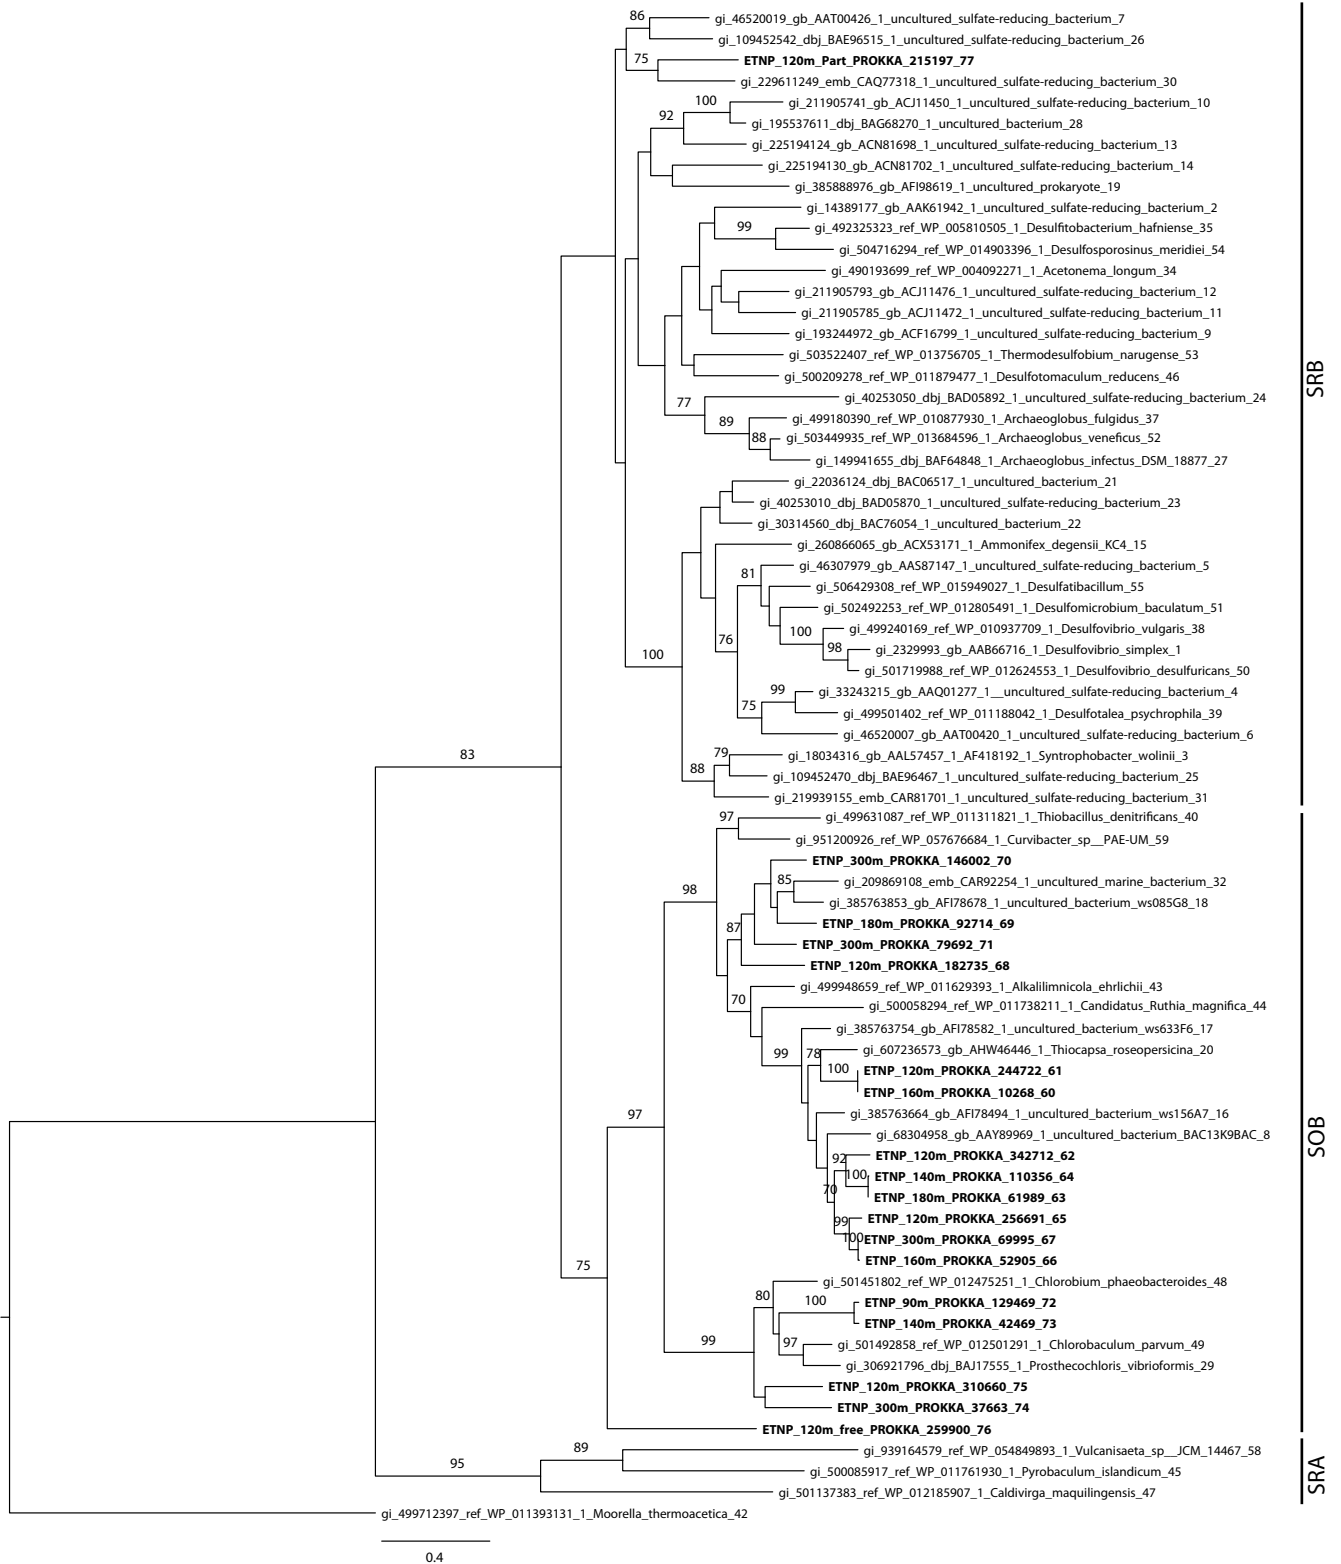

**Fig. S7.** A maximum likelihood tree of dissimilatory sulfite reductase, DsrA. This tree includes both the forward reductase bacterial form of DsrA (SRB), the reverse oxidase bacterial form (SOB), as well as the forward reductase archaeal form (SRA). *De novo* assembled environmental sequences from the ETNP ODZ metagenome are depicted in bold. Bootstrap values  $\geq 70$  are shown. The terminal number on sequence identifiers of the extant nodes of the tree are referred to as tree reference numbers which can be used to find sequence accession numbers from Table S8.



## Supplemental Tables

**Table S1.** Gene annotations of contigs containing *arrA* (ETNP\_allDepths\_ArrA\_contig\_2) *aioA* (ETNP\_allDepths\_AioA\_contig\_0), and *aioA-like* (ETNP\_120m\_NODE\_73101). Sequences in bold are arsenotrophy and arsenotrophy-related sequences, fumarate reductase, and the nitrate reductase sequence (*napA*).

|                                     | Gene_ID   | Start       | Stop        | Strand   | Length                         | Description                                                     |
|-------------------------------------|-----------|-------------|-------------|----------|--------------------------------|-----------------------------------------------------------------|
| <b>ArrA_ETNP_allDepths_contig_2</b> | <b>44</b> | <b>38</b>   | <b>2569</b> | <b>+</b> | <b>2532</b>                    | <b>Arsenate respiratory reductase, alpha subunit</b>            |
|                                     | <b>45</b> | <b>2588</b> | <b>3442</b> | <b>+</b> | <b>855</b>                     | <b>Arsenate respiratory reductase, beta subunit</b>             |
| <b>AioA_ETNP_allDepths_contig_0</b> | <b>1</b>  | <b>127</b>  | <b>639</b>  | <b>+</b> | <b>513</b>                     | <b>Arsenite Oxidase, beta subunit</b>                           |
|                                     | <b>2</b>  | <b>652</b>  | <b>3066</b> | <b>+</b> | <b>2415</b>                    | <b>Arsenite Oxidase, alpha subunit</b>                          |
|                                     | 3         | 3144        | 3278        | +        | 135                            | hypothetical protein                                            |
|                                     | 4         | 3335        | 3451        | +        | 117                            | Cytochrome C                                                    |
| <b>ETNP_120m_NODE_73101</b>         | 19        | 110         | 1231        | +        | 1122                           | Mrp/NBP35 ATP-binding protein, Domain of unknown function DUF59 |
|                                     | 20        | 1228        | 2178        | -        | 951                            | Thymidylate synthase ThyX                                       |
|                                     | 21        | 2565        | 3023        | +        | 459                            | Stringent starvation protein B                                  |
|                                     | 22        | 3072        | 4694        | +        | 1623                           | Fumarate lyase, FumAB                                           |
|                                     | 23        | 4709        | 4924        | +        | 216                            | Ribbon-helix-helix domain                                       |
|                                     | 24        | 4933        | 9021        | -        | 4089                           | AsmA-like, C-terminal                                           |
|                                     | 25        | 9245        | 9580        | +        | 336                            | Thiamine pyrophosphate enzyme, N-terminal TPP binding domain    |
|                                     | 26        | 9581        | 10513       | -        | 933                            | Xaa-Pro dipeptidyl-peptidase-like domain                        |
|                                     | 27        | 10603       | 11100       | +        | 498                            | Thioesterase-like superfamily                                   |
|                                     | 28        | 11479       | 11856       | +        | 378                            | Protein of unknown function DUF4389                             |
|                                     | 29        | 12141       | 13022       | +        | 882                            | Voltage gated chloride channel                                  |
| 30                                  | 12973     | 13890       | +           | 918      | Voltage gated chloride channel |                                                                 |

|           |              |              |   |             |                                                                                  |
|-----------|--------------|--------------|---|-------------|----------------------------------------------------------------------------------|
| 31        | 14459        | 15130        | + | 672         | NapC/NirT cytochrome c family, N-terminal region                                 |
| 32        | 15143        | 15796        | + | 654         | Cytochrome C oxidase, cbb3-type, subunit III                                     |
| <b>33</b> | <b>15812</b> | <b>18520</b> | + | <b>2709</b> | <b>NapA/NarB nitrate reductase catalytic subunit</b>                             |
| 34        | 18558        | 19148        | + | 591         | NapG, 4Fe-4S dicluster domain                                                    |
| 35        | 19149        | 20144        | + | 996         | NapH, 4Fe-4S binding domain                                                      |
| 36        | 20141        | 20734        | + | 594         | 4Fe-4S dicluster domain                                                          |
| 37        | 20738        | 21334        | + | 597         | hypothetical protein                                                             |
| 38        | 21315        | 21926        | + | 612         | 4Fe-4S dicluster domain                                                          |
| 39        | 21923        | 24013        | + | 2091        | Protein of unknown function, DUF255                                              |
| 40        | 24105        | 24893        | - | 789         | Enoyl-(Acyl carrier protein) reductase                                           |
| 41        | 25190        | 26104        | - | 915         | Pyruvate carboxyltransferase                                                     |
| 42        | 26108        | 28153        | - | 2046        | Biotin carboxylase, carbamoyl-phosphate synthase                                 |
| 43        | 28219        | 28584        | - | 366         | Potassium ion channel                                                            |
| 44        | 28597        | 29388        | - | 792         | Enoyl-CoA hydratase/isomerase                                                    |
| 45        | 29393        | 31000        | - | 1608        | Acetyl-coenzyme A carboxyltransferase, C-terminal                                |
| 46        | 30997        | 31833        | - | 837         | Amidohydrolase-related                                                           |
| 47        | 31830        | 32678        | - | 849         | Amidohydrolase-related                                                           |
| 48        | 32763        | 33962        | + | 1200        | CoA-transferase family III                                                       |
| 49        | 34074        | 34979        | + | 906         | Xylose isomerase-like TIM barrel                                                 |
| <b>50</b> | <b>34982</b> | <b>36475</b> | + | <b>1494</b> | <b>Succinate dehydrogenase/fumarate reductase flavoprotein, catalytic domain</b> |
| 51        | 36692        | 37411        | + | 720         | Short-chain dehydrogenase/reductase SDR                                          |
| 52        | 37481        | 38314        | + | 834         | Phytanoyl-CoA dioxygenase (PhyH)                                                 |
| 53        | 38395        | 39414        | + | 1020        | TRAP transporter solute receptor DctP/TeaA                                       |
| 54        | 39428        | 40447        | + | 1020        | TRAP transporter solute receptor DctP/TeaA                                       |
| 55        | 40457        | 40975        | + | 519         | Tripartite ATP-independent periplasmic transporter, DctQ component               |
| 56        | 40999        | 42288        | + | 1290        | TRAP C4-dicarboxylate transport system permease DctM subunit                     |
| 57        | 42510        | 43625        | - | 1116        | Putative bacterial porin                                                         |
| 58        | 44066        | 45493        | - | 1428        | Protoporphyrinogen oxidase                                                       |

|           |              |              |   |             |                                                           |
|-----------|--------------|--------------|---|-------------|-----------------------------------------------------------|
| 59        | 45469        | 46734        | - | 1266        | Coenzyme PQQ synthesis protein E                          |
| 60        | 46727        | 48376        | - | 1650        | Universal stress protein A, UspA                          |
| 61        | 48379        | 48558        | - | 180         | hypothetical protein                                      |
| 62        | 48575        | 50119        | - | 1545        | Cytochrome c-552/DMSO reductase-like, haem-binding domain |
| 63        | 50112        | 50879        | - | 768         | Cytochrome C oxidase, cbb3-type, subunit III              |
| 64        | 50876        | 51709        | - | 834         | Cytochrome c                                              |
| 65        | 51706        | 53496        | - | 1791        | Cytochrome bd terminal oxidase subunit I                  |
| 66        | 53515        | 53676        | - | 162         | hypothetical protein                                      |
| 67        | 53823        | 53927        | + | 105         | hypothetical protein                                      |
| 68        | 53934        | 54290        | - | 357         | Cytochrome C oxidase, cbb3-type, subunit III              |
| 69        | 54304        | 54963        | - | 660         | Cytochrome c                                              |
| 70        | 54960        | 56621        | - | 1662        | Cytochrome c-552/DMSO reductase-like, haem-binding domain |
| 71        | 56621        | 57619        | - | 999         | Cytochrome C oxidase, cbb3-type, subunit III              |
| 72        | 57603        | 58586        | - | 984         | Cytochrome c                                              |
| 73        | 58586        | 60766        | - | 2181        | Cytochrome bd terminal oxidase subunit I                  |
| 74        | 60767        | 61183        | - | 417         | Cytochrome C oxidase, cbb3-type, subunit III              |
| 75        | 61192        | 63342        | - | 2151        | Hypothetical HEAT repeat protein                          |
| <b>76</b> | <b>63445</b> | <b>66138</b> | - | <b>2694</b> | <b>Arsenite Oxidase Like, alpha subunit</b>               |
| <b>77</b> | <b>66154</b> | <b>66726</b> | - | <b>573</b>  | <b>Arsenite Oxidase Like, beta subunit</b>                |
| 78        | 66737        | 67015        | - | 279         | Cytochrome c                                              |
| 79        | 66987        | 68108        | - | 1122        | Di-haem cytochrome c peroxidase                           |
| 80        | 68124        | 69209        | - | 1086        | Di-haem cytochrome c peroxidase                           |
| 81        | 69523        | 70251        | - | 729         | Polysaccharide lyase family 4, domain II                  |
| 82        | 70897        | 71154        | - | 258         | ThiamineS/Molybdopterin converting factor subunit 1       |
| 83        | 71164        | 73437        | - | 2274        | Aldehyde oxidase/xanthine dehydrogenase, a/b hammerhead   |
| 84        | 73440        | 73916        | - | 477         | 2Fe-2S iron-sulfur cluster binding domain                 |
| 85        | 73920        | 74960        | - | 1041        | CO dehydrogenase flavoprotein-like, FAD-binding           |
| 86        | 75205        | 75324        | - | 120         | hypothetical protein                                      |

|    |       |       |   |      |                                                  |
|----|-------|-------|---|------|--------------------------------------------------|
| 87 | 75361 | 76152 | + | 792  | Luciferase-like monooxygenase                    |
| 88 | 76143 | 76412 | + | 270  | Hypothetical                                     |
| 89 | 76432 | 76953 | - | 522  | AMP-dependent synthetase/ligase                  |
| 90 | 76995 | 77996 | - | 1002 | AMP-dependent synthetase/ligase                  |
| 91 | 77924 | 79816 | - | 1893 | Thiamine pyrophosphate enzyme                    |
| 92 | 79813 | 80808 | - | 996  | Oxidoreductase family, NAD-binding Rossmann fold |
| 93 | 80818 | 81645 | - | 828  | Xylose isomerase-like TIM barrel                 |
| 94 | 81945 | 82532 | - | 588  | L-2-amino-thiazoline-4-carboxylic acid hydrolase |

**Table S2.** Arsenotrophy related genes identified on contigs in the NCBI WGS repository with associated locations of metagenomes and references.

| Gene      | Accession     | Lat       | Lon E     | Metagenome ID | Reference | Depth (m) | O2 ( $\mu\text{mol/kg}$ ) |
|-----------|---------------|-----------|-----------|---------------|-----------|-----------|---------------------------|
| ArrA      | CESR01313627  | -12.9794  | -96.0232  | TARA 100      | (5)       | 177       | 0.71                      |
| ArrA      | FLOH01000039  | 58.581234 | 18.232801 | GOS - GS678   | (6)       | 74        | 8.2                       |
| ArrA      | CEWJ01138853  | 0.0222    | -153.6858 | TARA 128      | (5)       | 40        | 176.98                    |
| AioA      | AACY020562416 | 35        | -120.9    | GOS - GS264   | (7)       | N/A       | N/A                       |
| AioA      | CEQZ01017993  | -20.4075  | -3.1641   | TARA 70       | (5)       | 800       | 161.73                    |
| AioA      | CENN01183657  | 42.2038   | 17.715    | TARA 023      | (5)       | 5         | 221.46                    |
| AioA      | CEQG01031482  | -20.9315  | -35.1794  | TARA 076      | (5)       | 800       | 192.17                    |
| AioA      | CEVX01167425  | 43.6792   | -16.8344  | TARA 152      | (5)       | 5         | 243.15                    |
| AioA      | CEVN01081717  | 25.5264   | -88.394   | TARA 142      | (5)       | 5         | 194.27                    |
| AioA      | CENZ01201832  | 39.3888   | 19.3905   | TARA 025      | (5)       | 50        | 229.55                    |
| AioA      | CENU01204471  | 39.3888   | 19.3905   | TARA 025      | (5)       | 5         | 218.02                    |
| AioA      | CEOF01053259  | 35.759    | 14.2574   | TARA 18       | (5)       | 5         | 207.79                    |
| AioA      | CEOP01145755  | 39.0609   | 5.9422    | TARA 09       | (5)       | 55        | N/A                       |
| AioA      | CEUY01205663  | -8.9109   | -140.2845 | TARA 123      | (5)       | 150       | 161.32                    |
| AioA      | FLOH01000367  | 58.581234 | 18.232801 | GOS - GS678   | (6)       | 74        | 8.2                       |
| AioA      | FLOH01000261  | 58.581234 | 18.232801 | GOS - GS678   | (6)       | 74        | 8.2                       |
| AioA      | FLOH01000179  | 58.581234 | 18.232801 | GOS - GS678   | (6)       | 74        | 8.2                       |
| AioA-Like | FLOH01000904  | 58.581234 | 18.232801 | GOS - GS678   | (6)       | 74        | 8.2                       |
| AioA-Like | CETX01297340  | 6.3559    | -103.0598 | TARA 138      | (5)       | 450       | 0.78                      |
| AioA-Like | CETX01146491  | 6.3559    | -103.0598 | TARA 138      | (5)       | 450       | 0.78                      |
| AioA-Like | CETX01130833  | 6.3559    | -103.0598 | TARA 138      | (5)       | 450       | 0.78                      |
| AioA-Like | CETX01082600  | 6.3559    | -103.0598 | TARA 138      | (5)       | 450       | 0.78                      |
| AioA-Like | CETX01081115  | 6.3559    | -103.0598 | TARA 138      | (5)       | 450       | 0.78                      |

|           |              |          |           |          |     |     |        |
|-----------|--------------|----------|-----------|----------|-----|-----|--------|
| AioA-Like | CEUC01150928 | 14.2075  | -116.6468 | TARA 137 | (5) | 40  | N/A    |
| AioA-Like | CEUC01150512 | 14.2075  | -116.6468 | TARA 137 | (5) | 40  | N/A    |
| AioA-Like | CEUC01148148 | 14.2075  | -116.6468 | TARA 137 | (5) | 40  | N/A    |
| AioA-Like | CEUC01132218 | 14.2075  | -116.6468 | TARA 137 | (5) | 40  | N/A    |
| AioA-Like | CEUC01099154 | 14.2075  | -116.6468 | TARA 137 | (5) | 40  | N/A    |
| AioA-Like | CESR01336801 | -12.9794 | -96.0232  | TARA 100 | (5) | 177 | 0.71   |
| AioA-Like | CESR01308561 | -12.9794 | -96.0232  | TARA 100 | (5) | 177 | 0.71   |
| AioA-Like | CESR01164964 | -12.9794 | -96.0232  | TARA 100 | (5) | 177 | 0.71   |
| AioA-Like | CESR01052301 | -12.9794 | -96.0232  | TARA 100 | (5) | 177 | 0.71   |
| AioA-Like | CESR01027707 | -12.9794 | -96.0232  | TARA 100 | (5) | 177 | 0.71   |
| AioA-Like | CESR01009492 | -12.9794 | -96.0232  | TARA 100 | (5) | 177 | 0.71   |
| AioA-Like | CEUD01063954 | 14.2025  | -116.6433 | TARA 137 | (5) | 375 | 0.63   |
| AioA-Like | CEUD01047464 | 14.2025  | -116.6433 | TARA 137 | (5) | 375 | 0.63   |
| AioA-Like | CEUD01022744 | 14.2025  | -116.6433 | TARA 137 | (5) | 375 | 0.63   |
| AioA-Like | CEUK01352792 | -8.8999  | -142.5461 | TARA 125 | (5) | 140 | 160.49 |
| AioA-Like | CEUK01093660 | -8.8999  | -142.5461 | TARA 125 | (5) | 140 | 160.49 |
| AioA-Like | CEUY01205454 | -8.9109  | -140.2845 | TARA 123 | (5) | 150 | 161.32 |
| AioA-Like | CESC01087940 | -30.1471 | -43.2915  | TARA 078 | (5) | 800 | 214.84 |
| AioA-Like | CEPV01090141 | 18.7341  | 66.3896   | TARA 039 | (5) | 270 | 2.3    |
| AioA-Like | CEPV01017105 | 18.7341  | 66.3896   | TARA 039 | (5) | 270 | 2.3    |
| AioA-Like | CEPV01009366 | 18.7341  | 66.3896   | TARA 039 | (5) | 270 | 2.3    |
| AioA-Like | CEPS01046010 | 19.0351  | 64.5638   | TARA 038 | (5) | 340 | 2.37   |
| AioA-Like | CEPS01021636 | 19.0351  | 64.5638   | TARA 038 | (5) | 340 | 2.37   |
| AioA-Like | CEQG01120352 | -20.9315 | -35.1794  | TARA 076 | (5) | 800 | 192.17 |
| AioA-Like | CEQE01082710 | 20.8457  | 63.5851   | TARA 037 | (5) | 600 | 1.64   |
| AioA-Like | CEQE01005538 | 20.8457  | 63.5851   | TARA 037 | (5) | 600 | 1.64   |

**Table S3.** Short metatranscriptomic read identifiers for reads placed to respective clades on Fig. 5 of the main text.

| Clade     | Metatranscriptome          | Short Read(s) placed to Clade                                                    |
|-----------|----------------------------|----------------------------------------------------------------------------------|
| AioA      | ETNP Metatranscriptome (8) | SRR1824292_1332265_1_1332265_length_245                                          |
| AioA      | ETNP Metatranscriptome (8) | SRR1824292_1797719_1_1797719_length_210, SRR1824292_1797719_2_1797719_length_251 |
| AioA      | ETSP Metatranscriptome (9) | SRR064451_179135_2_FYBUZCR01BOHYC_length_197                                     |
| AioA      | ETSP Metatranscriptome (9) | SRR064451_301398_2_FYBUZCR02FOCM8_length_122                                     |
| AioA      | ETSP Metatranscriptome (9) | SRR064449_328481_2_FYSIMWX02JIROK_length_260                                     |
| AioA      | ETSP Metatranscriptome (9) | SRR064451_383970_2_FYBUZCR02FHSRD_length_122                                     |
| AioA      | ETSP Metatranscriptome (9) | SRR064451_326615_2_FYBUZCR02IXCWO_length_169                                     |
| AioA      | ETSP Metatranscriptome (9) | SRR064449_446454_2_FYSIMWX02JSX01_length_198                                     |
| AioA-Like | ETNP Metatranscriptome (8) | SRR1824292_1352027_1_1352027_length_125                                          |
| AioA-Like | ETNP Metatranscriptome (8) | SRR1824292_1385587_1_1385587_length_195                                          |
| AioA-Like | ETNP Metatranscriptome (8) | SRR1824292_1854946_1_1854946_length_251                                          |
| AioA-Like | ETNP Metatranscriptome (8) | SRR1824293_1092788_1_1092788_length_238                                          |
| AioA-Like | ETNP Metatranscriptome (8) | SRR1824293_1113546_1_1113546_length_176                                          |
| AioA-Like | ETNP Metatranscriptome (8) | SRR1824293_1177306_1_1177306_length_223                                          |
| AioA-Like | ETNP Metatranscriptome (8) | SRR1824293_417623_1_417623_length_194                                            |
| AioA-Like | ETNP Metatranscriptome (8) | SRR1824293_551967_1_551967_length_128                                            |
| AioA-Like | ETNP Metatranscriptome (8) | SRR1824293_684854_1_684854_length_251                                            |
| AioA-Like | ETNP Metatranscriptome (8) | SRR1824293_711876_2_711876_length_248                                            |
| AioA-Like | ETNP Metatranscriptome (8) | SRR1824293_790420_1_790420_length_141                                            |
| AioA-Like | ETNP Metatranscriptome (8) | SRR1824293_876665_1_876665_length_124                                            |
| AioA-Like | ETNP Metatranscriptome (8) | SRR1824293_937316_1_937316_length_249                                            |
| AioA-Like | ETNP Metatranscriptome (8) | SRR1824293_973656_1_973656_length_231                                            |
| AioA-Like | ETNP Metatranscriptome (8) | SRR1824294_1272699_1_1272699_length_161                                          |
| AioA-Like | ETNP Metatranscriptome (8) | SRR1824294_1457318_1_1457318_length_109                                          |

|           |                            |                                              |
|-----------|----------------------------|----------------------------------------------|
| AioA-Like | ETNP Metatranscriptome (8) | SRR1824294_1624413_1_1624413_length_110      |
| AioA-Like | ETNP Metatranscriptome (8) | SRR1824294_1667542_1_1667542_length_148      |
| AioA-Like | ETNP Metatranscriptome (8) | SRR1824294_1689113_1_1689113_length_150      |
| AioA-Like | ETNP Metatranscriptome (8) | SRR1824294_1720524_1_1720524_length_198      |
| AioA-Like | ETNP Metatranscriptome (8) | SRR1824294_334487_1_334487_length_250        |
| AioA-Like | ETNP Metatranscriptome (8) | SRR1824294_62547_1_62547_length_166          |
| AioA-Like | ETNP Metatranscriptome (8) | SRR1824294_862819_1_862819_length_149        |
| AioA-Like | ETNP Metatranscriptome (8) | SRR1824296_823718_1_823718_length_178        |
| AioA-Like | ETNP Metatranscriptome (8) | SRR1824298_866734_1_866734_length_251        |
| AioA-Like | ETNP Metatranscriptome (8) | SRR1824300_754100_1_754100_length_132        |
| AioA-Like | ETSP Metatranscriptome (9) | SRR064449_263268_2_FYSIMWX01BLS0F_length_240 |
| AioA-Like | ETSP Metatranscriptome (9) | SRR064451_104475_2_FYBUZCR01A817B_length_141 |
| AioA-Like | ETSP Metatranscriptome (9) | SRR064451_137020_2_FYBUZCR01BD5NK_length_287 |
| AioA-Like | ETSP Metatranscriptome (9) | SRR064451_156479_2_FYBUZCR01A3MJG_length_170 |
| AioA-Like | ETSP Metatranscriptome (9) | SRR064451_163179_2_FYBUZCR01BJEE_length_281  |
| AioA-Like | ETSP Metatranscriptome (9) | SRR064451_261335_2_FYBUZCR02JAKL3_length_141 |
| AioA-Like | ETSP Metatranscriptome (9) | SRR064451_267221_2_FYBUZCR02IOUJK_length_248 |
| AioA-Like | ETSP Metatranscriptome (9) | SRR064451_296472_2_FYBUZCR02HOG7U_length_123 |
| AioA-Like | ETSP Metatranscriptome (9) | SRR064451_307022_2_FYBUZCR02GFXWW_length_122 |
| AioA-Like | ETSP Metatranscriptome (9) | SRR064451_316620_2_FYBUZCR02HXLZZ_length_231 |
| AioA-Like | ETSP Metatranscriptome (9) | SRR064451_322487_2_FYBUZCR02H668N_length_162 |
| AioA-Like | ETSP Metatranscriptome (9) | SRR064451_329301_2_FYBUZCR02H8KF1_length_250 |
| AioA-Like | ETSP Metatranscriptome (9) | SRR064451_338803_2_FYBUZCR02ICR4V_length_141 |
| AioA-Like | ETSP Metatranscriptome (9) | SRR064451_40320_2_FYBUZCR01C4K1X_length_250  |
| AioA-Like | ETSP Metatranscriptome (9) | SRR064451_406559_2_FYBUZCR02IAW7Z_length_271 |
| AioA-Like | ETSP Metatranscriptome (9) | SRR064451_407733_2_FYBUZCR02JK9UT_length_271 |
| AioA-Like | ETSP Metatranscriptome (9) | SRR064451_412492_2_FYBUZCR02IOJLJ_length_265 |



|           |                            |                                                                             |
|-----------|----------------------------|-----------------------------------------------------------------------------|
| AioA-Like | ETSP Sulfide Plume (10)    | GOK4BGD04JTT53_length_367_xy_3913_1129_region_4_run_R_2011_04_06_07_55_54_0 |
| AioA-Like | ETSP Sulfide Plume (10)    | GPIPG5Q04JUZPK_length_147_xy_3926_1718_region_4_run_R_2010_10_15_04_30_31_0 |
| AioA-Like | ETSP Sulfide Plume (10)    | GZ2L4FS04IGEY8_length_456_xy_3350_1346_region_4_run_R_2011_03_28_08_06_05_0 |
| AioA-Like | ETSP Sulfide Plume (10)    | GZ2L4FS04JF077_length_496_xy_3756_0165_region_4_run_R_2011_03_28_08_06_05_0 |
| ArrA      | ETSP Metatranscriptome (9) | SRR064451_376977_2_FYBUZCR02HQWFX_length_260                                |
| ArrA      | ETSP Sulfide Plume (10)    | GOK4BGD04JQZB5_length_384_xy_3880_3027_region_4_run_R_2011_04_06_07_55_54   |
| ArrA      | ETSP Sulfide Plume (10)    | GPIPG5Q04HXZA9_length_450_xy_3140_1395_region_4_run_R_2010_10_15_04_30_31   |
| ArrA      | ETSP Sulfide Plume (10)    | GPIPG5Q04IVYIW_length_393_xy_3527_1526_region_4_run_R_2010_10_15_04_30_31   |
| ArrA      | ETSP Sulfide Plume (10)    | GPIPG5Q04IZ6RE_length_509_xy_3575_2216_region_4_run_R_2010_10_15_04_30_31   |
| ArrA      | ETSP Sulfide Plume (10)    | GPIPG5Q04JUXS9_length_341_xy_3925_3355_region_4_run_R_2010_10_15_04_30_31   |
| ArrA      | ETSP Sulfide Plume (10)    | GZ2L4FS04IH2V0_length_490_xy_3369_1166_region_4_run_R_2011_03_28_08_06_05   |
| DsrA-SRB  | ETSP Sulfide Plume (10)    | GPIPG5Q03FLKHB_length_521_xy_2178_3421_region_3_run_R_2010_10_15_04_30_31_0 |
| DsrA-SRB  | ETSP Sulfide Plume (10)    | GOK4BGD04IPJ1M_length_558_xy_3454_1832_region_4_run_R_2011_04_06_07_55_54_0 |
| DsrA-SRB  | ETSP Sulfide Plume (10)    | GOK4BGD04JW2OC_length_536_xy_3950_0570_region_4_run_R_2011_04_06_07_55_54_0 |
| DsrA-SRB  | ETSP Sulfide Plume (10)    | GPIPG5Q04IATXX_length_447_xy_3286_2947_region_4_run_R_2010_10_15_04_30_31_0 |
| DsrA-SRB  | ETSP Sulfide Plume (10)    | GZ2L4FS04I43V2_length_384_xy_3631_2400_region_4_run_R_2011_03_28_08_06_05_0 |
| DsrA-SRB  | ETSP Sulfide Plume (10)    | GOK4BGD04IH6LS_length_380_xy_3370_1886_region_4_run_R_2011_04_06_07_55_54_0 |
| DsrA-SRB  | ETSP Sulfide Plume (10)    | GZ2L4FS04IZNML_length_491_xy_3569_1995_region_4_run_R_2011_03_28_08_06_05_0 |
| DsrA-SRB  | ETSP Sulfide Plume (10)    | GOK4BGD04JN5J_length_428_xy_3797_1909_region_4_run_R_2011_04_06_07_55_54_0  |
| DsrA-SRB  | ETSP Sulfide Plume (10)    | GPIPG5Q04IAFPV_length_383_xy_3282_0897_region_4_run_R_2010_10_15_04_30_31_0 |
| DsrA-SRB  | ETSP Sulfide Plume (10)    | GOK4BGD04IEQP3_length_489_xy_3331_1081_region_4_run_R_2011_04_06_07_55_54_0 |
| DsrA-SRB  | ETSP Sulfide Plume (10)    | GPIPG5Q04I5Z86_length_422_xy_3641_3384_region_4_run_R_2010_10_15_04_30_31_0 |
| DsrA-SRB  | ETSP Sulfide Plume (10)    | GZ2L4FS04IRHI1_length_521_xy_3476_1771_region_4_run_R_2011_03_28_08_06_05_0 |
| DsrA-SRB  | ETSP Sulfide Plume (10)    | GOK4BGD04ILOFN_length_274_xy_3410_1121_region_4_run_R_2011_04_06_07_55_54_0 |
| DsrA-SRB  | ETSP Sulfide Plume (10)    | GPIPG5Q03F9464_length_511_xy_2458_3134_region_3_run_R_2010_10_15_04_30_31_0 |
| DsrA-SRB  | ETSP Sulfide Plume (10)    | GOK4BGD04IN48R_length_435_xy_3438_1529_region_4_run_R_2011_04_06_07_55_54_0 |
| DsrA-SRB  | ETSP Sulfide Plume (10)    | GOK4BGD04IKP75_length_301_xy_3399_1843_region_4_run_R_2011_04_06_07_55_54_0 |

|          |                         |                                                                             |
|----------|-------------------------|-----------------------------------------------------------------------------|
| DsrA-SRB | ETSP Sulfide Plume (10) | GPIPG5Q04I2YFJ_length_459_xy_3607_0317_region_4_run_R_2010_10_15_04_30_31_0 |
| DsrA-SRB | ETSP Sulfide Plume (10) | GOK4BGD04JZ6X5_length_485_xy_3985_2715_region_4_run_R_2011_04_06_07_55_54_0 |
| DsrA-SRB | ETSP Sulfide Plume (10) | GOK4BGD04IFDQY_length_488_xy_3338_2248_region_4_run_R_2011_04_06_07_55_54_0 |
| DsrA-SRB | ETSP Sulfide Plume (10) | GPIPG5Q04JJ5VJ_length_418_xy_3803_0301_region_4_run_R_2010_10_15_04_30_31_0 |
| DsrA-SRB | ETSP Sulfide Plume (10) | GOK4BGD04JGR2H_length_489_xy_3764_2183_region_4_run_R_2011_04_06_07_55_54_0 |
| DsrA-SRB | ETSP Sulfide Plume (10) | GOK4BGD04JQ15O_length_469_xy_3881_2586_region_4_run_R_2011_04_06_07_55_54_0 |
| DsrA-SRB | ETSP Sulfide Plume (10) | GOK4BGD04JDGA8_length_385_xy_3726_2626_region_4_run_R_2011_04_06_07_55_54_0 |
| DsrA-SRB | ETSP Sulfide Plume (10) | GPIPG5Q03FZHXP_length_331_xy_2337_2043_region_3_run_R_2010_10_15_04_30_31_0 |
| DsrA-SRB | ETSP Sulfide Plume (10) | GPIPG5Q03GNPQG_length_464_xy_2613_1038_region_3_run_R_2010_10_15_04_30_31_0 |
| DsrA-SRB | ETSP Sulfide Plume (10) | GOK4BGD04IOUCN_length_444_xy_3446_1301_region_4_run_R_2011_04_06_07_55_54_0 |
| DsrA-SRB | ETSP Sulfide Plume (10) | GPIPG5Q04ISF3C_length_138_xy_3487_1510_region_4_run_R_2010_10_15_04_30_31_0 |
| DsrA-SRB | ETSP Sulfide Plume (10) | GOK4BGD04IDHZZ_length_505_xy_3317_0461_region_4_run_R_2011_04_06_07_55_54_0 |
| DsrA-SRB | ETSP Sulfide Plume (10) | GPIPG5Q04ILEVD_length_439_xy_3407_1015_region_4_run_R_2010_10_15_04_30_31_0 |
| DsrA-SRB | ETSP Sulfide Plume (10) | GOK4BGD04ICQOE_length_466_xy_3308_1916_region_4_run_R_2011_04_06_07_55_54_0 |
| DsrA-SRB | ETSP Sulfide Plume (10) | GOK4BGD04IIX48_length_458_xy_3379_0714_region_4_run_R_2011_04_06_07_55_54_0 |
| DsrA-SRB | ETSP Sulfide Plume (10) | GOK4BGD04IL433_length_435_xy_3415_2257_region_4_run_R_2011_04_06_07_55_54_0 |
| DsrA-SRB | ETSP Sulfide Plume (10) | GOK4BGD04H3CY4_length_469_xy_3201_2526_region_4_run_R_2011_04_06_07_55_54_0 |
| DsrA-SRB | ETSP Sulfide Plume (10) | GOK4BGD04H7WO2_length_459_xy_3253_1716_region_4_run_R_2011_04_06_07_55_54_0 |
| DsrA-SRB | ETSP Sulfide Plume (10) | GOK4BGD04ITZ20_length_325_xy_3505_0346_region_4_run_R_2011_04_06_07_55_54_0 |
| DsrA-SRB | ETSP Sulfide Plume (10) | GPIPG5Q04ITY1G_length_408_xy_3504_3090_region_4_run_R_2010_10_15_04_30_31_0 |
| DsrA-SRB | ETSP Sulfide Plume (10) | GOK4BGD04IXD2M_length_391_xy_3543_2796_region_4_run_R_2011_04_06_07_55_54_0 |
| DsrA-SRB | ETSP Sulfide Plume (10) | GPIPG5Q04IJGYO_length_350_xy_3385_0526_region_4_run_R_2010_10_15_04_30_31_0 |
| DsrA-SRB | ETSP Sulfide Plume (10) | GOK4BGD04IVL6W_length_415_xy_3523_1926_region_4_run_R_2011_04_06_07_55_54_0 |
| DsrA-SRB | ETSP Sulfide Plume (10) | GPIPG5Q04IND6W_length_183_xy_3429_3334_region_4_run_R_2010_10_15_04_30_31_0 |
| DsrA-SRB | ETSP Sulfide Plume (10) | GZ2L4FS04JR3BU_length_477_xy_3893_1608_region_4_run_R_2011_03_28_08_06_05_0 |
| DsrA-SRB | ETSP Sulfide Plume (10) | GOK4BGD04JXPPO_length_370_xy_3957_1754_region_4_run_R_2011_04_06_07_55_54_0 |
| DsrA-SRB | ETSP Sulfide Plume (10) | GOK4BGD04JOO3I_length_309_xy_3854_2940_region_4_run_R_2011_04_06_07_55_54_0 |

|          |                            |                                                                                     |
|----------|----------------------------|-------------------------------------------------------------------------------------|
| DsrA-SRB | ETSP Sulfide Plume (10)    | GOK4BGD04JOH4T_length_443_xy_3852_2107_region_4_run_R_2011_04_06_07_55_54_0         |
| DsrA-SRB | ETSP Sulfide Plume (10)    | GOK4BGD04JOTFE_length_392_xy_3856_0360_region_4_run_R_2011_04_06_07_55_54_0         |
| DsrA-SRB | ETSP Sulfide Plume (10)    | GOK4BGD04IWCJH_length_442_xy_3531_3307_region_4_run_R_2011_04_06_07_55_54_0         |
| DsrA-SRB | ETSP Sulfide Plume (10)    | GPIPG5Q03GRSSN_length_417_xy_2659_3573_region_3_run_R_2010_10_15_04_30_31_0         |
| DsrA-SRB | ETSP Sulfide Plume (10)    | GPIPG5Q02ECKUX_length_499_xy_1666_1543_region_2_run_R_2010_10_15_04_30_31_0         |
| DsrA-SRB | ETSP Sulfide Plume (10)    | GOK4BGD04JXKCZ_length_508_xy_3955_3009_region_4_run_R_2011_04_06_07_55_54_0         |
| DsrA-SRB | ETSP Sulfide Plume (10)    | GOK4BGD04I1OWA_length_460_xy_3592_2744_region_4_run_R_2011_04_06_07_55_54_0         |
| DsrA-SRB | ETSP Sulfide Plume (10)    | GOK4BGD04H8NB9_length_189_xy_3261_3479_region_4_run_R_2011_04_06_07_55_54_0         |
| DsrA-SRB | ETSP Sulfide Plume (10)    | GZ2L4FS04ICB6Q_length_393_xy_3303_3616_region_4_run_R_2011_03_28_08_06_05_0         |
| DsrA-SOB | ETNP Metatranscriptome (8) | SRR1824291_1177691_2_1177691_length_248_2                                           |
| DsrA-SOB | ETNP Metatranscriptome (8) | SRR1824291_952073_2_952073_length_251_2                                             |
| DsrA-SOB | ETNP Metatranscriptome (8) | SRR1824296_229493_2_229493_length_251_2                                             |
| DsrA-SOB | ETNP Metatranscriptome (8) | SRR1824291_1331456_1_1331456_length_205_1/SRR1824291_1331456_2_1331456_length_251_2 |
| DsrA-SOB | ETNP Metatranscriptome (8) | SRR1824291_153331_1_153331_length_228_1/SRR1824291_153331_2_153331_length_251_2     |
| DsrA-SOB | ETNP Metatranscriptome (8) | SRR1824291_605794_1_605794_length_199_1/SRR1824291_605794_2_605794_length_250_2     |
| DsrA-SOB | ETNP Metatranscriptome (8) | SRR1824292_1379907_1_1379907_length_251_1/SRR1824292_1379907_2_1379907_length_251_2 |
| DsrA-SOB | ETNP Metatranscriptome (8) | SRR1824292_474600_1_474600_length_107_1/SRR1824292_474600_2_474600_length_250_2     |
| DsrA-SOB | ETNP Metatranscriptome (8) | SRR1824292_637084_1_637084_length_201_1/SRR1824292_637084_2_637084_length_251_2     |
| DsrA-SOB | ETNP Metatranscriptome (8) | SRR1824292_638321_1_638321_length_204_1/SRR1824292_638321_2_638321_length_251_2     |
| DsrA-SOB | ETNP Metatranscriptome (8) | SRR1824294_1268313_1_1268313_length_251_1/SRR1824294_1268313_2_1268313_length_251_2 |
| DsrA-SOB | ETNP Metatranscriptome (8) | SRR1824294_2007021_1_2007021_length_124_1/SRR1824294_2007021_2_2007021_length_251_2 |
| DsrA-SOB | ETNP Metatranscriptome (8) | SRR1824296_429484_1_429484_length_251_1/SRR1824296_429484_2_429484_length_250_2     |
| DsrA-SOB | ETSP Metatranscriptome (9) | SRR064445_173737_2_FX4HCEY01ELJMC_length_132_0                                      |
| DsrA-SOB | ETSP Metatranscriptome (9) | SRR064445_226792_2_FX4HCEY02HTXD6_length_123_0                                      |
| DsrA-SOB | ETSP Metatranscriptome (9) | SRR064449_102388_2_FYSIMWX01A43XZ_length_133_0                                      |
| DsrA-SOB | ETSP Metatranscriptome (9) | SRR064449_144673_2_FYSIMWX01BVIVE_length_236_0                                      |
| DsrA-SOB | ETSP Metatranscriptome (9) | SRR064449_187893_2_FYSIMWX01A9JL6_length_236_0                                      |

|          |                            |                                                                             |
|----------|----------------------------|-----------------------------------------------------------------------------|
| DsrA-SOB | ETSP Metatranscriptome (9) | SRR064449_257646_2_FYSIMWX01BVLCI_length_263_0                              |
| DsrA-SOB | ETSP Metatranscriptome (9) | SRR064449_269724_2_FYSIMWX01AP39C_length_245_0                              |
| DsrA-SOB | ETSP Metatranscriptome (9) | SRR064449_389722_2_FYSIMWX02GO71O_length_127_0                              |
| DsrA-SOB | ETSP Metatranscriptome (9) | SRR064451_145281_2_FYBUZCR01CK2Z6_length_246_0                              |
| DsrA-SOB | ETSP Metatranscriptome (9) | SRR064451_157290_2_FYBUZCR01A2Z9L_length_171_0                              |
| DsrA-SOB | ETSP Metatranscriptome (9) | SRR064451_158716_2_FYBUZCR01BPAUH_length_235_0                              |
| DsrA-SOB | ETSP Metatranscriptome (9) | SRR064451_208875_2_FYBUZCR01C4NNH_length_178_0                              |
| DsrA-SOB | ETSP Metatranscriptome (9) | SRR064451_21893_2_FYBUZCR01CGCZY_length_117_0                               |
| DsrA-SOB | ETSP Metatranscriptome (9) | SRR064451_241474_2_FYBUZCR02G3XGS_length_251_0                              |
| DsrA-SOB | ETSP Metatranscriptome (9) | SRR064451_281036_2_FYBUZCR02GR3KL_length_257_0                              |
| DsrA-SOB | ETSP Metatranscriptome (9) | SRR064451_289176_2_FYBUZCR02GQFV9_length_233_0                              |
| DsrA-SOB | ETSP Metatranscriptome (9) | SRR064451_294810_2_FYBUZCR02H7RLT_length_108_0                              |
| DsrA-SOB | ETSP Metatranscriptome (9) | SRR064451_31795_2_FYBUZCR01DQ9DF_length_249_0                               |
| DsrA-SOB | ETSP Metatranscriptome (9) | SRR064451_335126_2_FYBUZCR02IMISQ_length_151_0                              |
| DsrA-SOB | ETSP Metatranscriptome (9) | SRR064451_379731_2_FYBUZCR02JSPDC_length_193_0                              |
| DsrA-SOB | ETSP Metatranscriptome (9) | SRR064451_385062_2_FYBUZCR02HXWSK_length_142_0                              |
| DsrA-SOB | ETSP Metatranscriptome (9) | SRR064451_390968_2_FYBUZCR02IF4NG_length_216_0                              |
| DsrA-SOB | ETSP Metatranscriptome (9) | SRR064451_46889_2_FYBUZCR01C4HBV_length_214_0                               |
| DsrA-SOB | ETSP Metatranscriptome (9) | SRR064451_58261_2_FYBUZCR01CAEAX_length_163_0                               |
| DsrA-SOB | ETSP Metatranscriptome (9) | SRR064451_91375_2_FYBUZCR01D875P_length_198_0                               |
| DsrA-SOB | ETSP Sulfide Plume (10)    | GOK4BGD04H0RKS_length_325_xy_3172_0266_region_4_run_R_2011_04_06_07_55_54_0 |
| DsrA-SOB | ETSP Sulfide Plume (10)    | GOK4BGD04H1QL3_length_495_xy_3183_0617_region_4_run_R_2011_04_06_07_55_54_0 |
| DsrA-SOB | ETSP Sulfide Plume (10)    | GOK4BGD04H210L_length_169_xy_3198_0611_region_4_run_R_2011_04_06_07_55_54_0 |
| DsrA-SOB | ETSP Sulfide Plume (10)    | GOK4BGD04H2NAL_length_433_xy_3193_2011_region_4_run_R_2011_04_06_07_55_54_0 |
| DsrA-SOB | ETSP Sulfide Plume (10)    | GOK4BGD04H3Y5P_length_419_xy_3208_2603_region_4_run_R_2011_04_06_07_55_54_0 |
| DsrA-SOB | ETSP Sulfide Plume (10)    | GOK4BGD04H4527_length_472_xy_3222_0789_region_4_run_R_2011_04_06_07_55_54_0 |
| DsrA-SOB | ETSP Sulfide Plume (10)    | GOK4BGD04H47Z5_length_477_xy_3222_3379_region_4_run_R_2011_04_06_07_55_54_0 |

|          |                         |                                                                             |
|----------|-------------------------|-----------------------------------------------------------------------------|
| DsrA-SOB | ETSP Sulfide Plume (10) | GOK4BGD04H5OKU_length_241_xy_3228_0284_region_4_run_R_2011_04_06_07_55_54_0 |
| DsrA-SOB | ETSP Sulfide Plume (10) | GOK4BGD04H5V0S_length_172_xy_3230_1738_region_4_run_R_2011_04_06_07_55_54_0 |
| DsrA-SOB | ETSP Sulfide Plume (10) | GOK4BGD04H718O_length_488_xy_3255_0710_region_4_run_R_2011_04_06_07_55_54_0 |
| DsrA-SOB | ETSP Sulfide Plume (10) | GOK4BGD04H7RKN_length_470_xy_3251_3269_region_4_run_R_2011_04_06_07_55_54_0 |
| DsrA-SOB | ETSP Sulfide Plume (10) | GOK4BGD04H7SHD_length_498_xy_3252_0351_region_4_run_R_2011_04_06_07_55_54_0 |
| DsrA-SOB | ETSP Sulfide Plume (10) | GOK4BGD04H9GZK_length_446_xy_3271_0942_region_4_run_R_2011_04_06_07_55_54_0 |
| DsrA-SOB | ETSP Sulfide Plume (10) | GOK4BGD04HZ2UL_length_345_xy_3164_0987_region_4_run_R_2011_04_06_07_55_54_0 |
| DsrA-SOB | ETSP Sulfide Plume (10) | GOK4BGD04I0ENW_length_429_xy_3578_0170_region_4_run_R_2011_04_06_07_55_54_0 |
| DsrA-SOB | ETSP Sulfide Plume (10) | GOK4BGD04I1ICZ_length_499_xy_3590_2465_region_4_run_R_2011_04_06_07_55_54_0 |
| DsrA-SOB | ETSP Sulfide Plume (10) | GOK4BGD04I1N9G_length_457_xy_3592_1922_region_4_run_R_2011_04_06_07_55_54_0 |
| DsrA-SOB | ETSP Sulfide Plume (10) | GOK4BGD04I22JA_length_482_xy_3608_1540_region_4_run_R_2011_04_06_07_55_54_0 |
| DsrA-SOB | ETSP Sulfide Plume (10) | GOK4BGD04I4NTF_length_447_xy_3626_2049_region_4_run_R_2011_04_06_07_55_54_0 |
| DsrA-SOB | ETSP Sulfide Plume (10) | GOK4BGD04I580E_length_434_xy_3644_2444_region_4_run_R_2011_04_06_07_55_54_0 |
| DsrA-SOB | ETSP Sulfide Plume (10) | GOK4BGD04I6DZ6_length_468_xy_3646_0724_region_4_run_R_2011_04_06_07_55_54_0 |
| DsrA-SOB | ETSP Sulfide Plume (10) | GOK4BGD04I7BU9_length_499_xy_3656_3651_region_4_run_R_2011_04_06_07_55_54_0 |
| DsrA-SOB | ETSP Sulfide Plume (10) | GOK4BGD04I7XRA_length_154_xy_3663_3348_region_4_run_R_2011_04_06_07_55_54_0 |
| DsrA-SOB | ETSP Sulfide Plume (10) | GOK4BGD04I8FBA_length_490_xy_3669_1524_region_4_run_R_2011_04_06_07_55_54_0 |
| DsrA-SOB | ETSP Sulfide Plume (10) | GOK4BGD04I8LC5_length_372_xy_3671_1175_region_4_run_R_2011_04_06_07_55_54_0 |
| DsrA-SOB | ETSP Sulfide Plume (10) | GOK4BGD04I8PGQ_length_448_xy_3672_2392_region_4_run_R_2011_04_06_07_55_54_0 |
| DsrA-SOB | ETSP Sulfide Plume (10) | GOK4BGD04I926H_length_495_xy_3688_1287_region_4_run_R_2011_04_06_07_55_54_0 |
| DsrA-SOB | ETSP Sulfide Plume (10) | GOK4BGD04I989F_length_311_xy_3690_0977_region_4_run_R_2011_04_06_07_55_54_0 |
| DsrA-SOB | ETSP Sulfide Plume (10) | GOK4BGD04IACHG_length_381_xy_3281_0802_region_4_run_R_2011_04_06_07_55_54_0 |
| DsrA-SOB | ETSP Sulfide Plume (10) | GOK4BGD04IB1K3_length_479_xy_3300_2165_region_4_run_R_2011_04_06_07_55_54_0 |
| DsrA-SOB | ETSP Sulfide Plume (10) | GOK4BGD04IB38F_length_276_xy_3301_1501_region_4_run_R_2011_04_06_07_55_54_0 |
| DsrA-SOB | ETSP Sulfide Plume (10) | GOK4BGD04IB9P1_length_503_xy_3303_0423_region_4_run_R_2011_04_06_07_55_54_0 |
| DsrA-SOB | ETSP Sulfide Plume (10) | GOK4BGD04ICG2H_length_486_xy_3305_1751_region_4_run_R_2011_04_06_07_55_54_0 |
| DsrA-SOB | ETSP Sulfide Plume (10) | GOK4BGD04ICMIW_length_480_xy_3307_0630_region_4_run_R_2011_04_06_07_55_54_0 |

|          |                         |                                                                             |
|----------|-------------------------|-----------------------------------------------------------------------------|
| DsrA-SOB | ETSP Sulfide Plume (10) | GOK4BGD04IE0D3_length_450_xy_3334_1321_region_4_run_R_2011_04_06_07_55_54_0 |
| DsrA-SOB | ETSP Sulfide Plume (10) | GOK4BGD04IE85H_length_484_xy_3337_0387_region_4_run_R_2011_04_06_07_55_54_0 |
| DsrA-SOB | ETSP Sulfide Plume (10) | GOK4BGD04IEL8U_length_325_xy_3329_3468_region_4_run_R_2011_04_06_07_55_54_0 |
| DsrA-SOB | ETSP Sulfide Plume (10) | GOK4BGD04IF5H1_length_493_xy_3347_1351_region_4_run_R_2011_04_06_07_55_54_0 |
| DsrA-SOB | ETSP Sulfide Plume (10) | GOK4BGD04IF705_length_495_xy_3348_0535_region_4_run_R_2011_04_06_07_55_54_0 |
| DsrA-SOB | ETSP Sulfide Plume (10) | GOK4BGD04IFDRU_length_406_xy_3338_2280_region_4_run_R_2011_04_06_07_55_54_0 |
| DsrA-SOB | ETSP Sulfide Plume (10) | GOK4BGD04IG9YO_length_431_xy_3360_0542_region_4_run_R_2011_04_06_07_55_54_0 |
| DsrA-SOB | ETSP Sulfide Plume (10) | GOK4BGD04IGN9N_length_497_xy_3353_1097_region_4_run_R_2011_04_06_07_55_54_0 |
| DsrA-SOB | ETSP Sulfide Plume (10) | GOK4BGD04IGSCM_length_423_xy_3354_2292_region_4_run_R_2011_04_06_07_55_54_0 |
| DsrA-SOB | ETSP Sulfide Plume (10) | GOK4BGD04IHG5M_length_494_xy_3362_1672_region_4_run_R_2011_04_06_07_55_54_0 |
| DsrA-SOB | ETSP Sulfide Plume (10) | GOK4BGD04IHHJ6_length_539_xy_3362_2196_region_4_run_R_2011_04_06_07_55_54_0 |
| DsrA-SOB | ETSP Sulfide Plume (10) | GOK4BGD04II1DV_length_497_xy_3380_0817_region_4_run_R_2011_04_06_07_55_54_0 |
| DsrA-SOB | ETSP Sulfide Plume (10) | GOK4BGD04IIQD4_length_289_xy_3376_2954_region_4_run_R_2011_04_06_07_55_54_0 |
| DsrA-SOB | ETSP Sulfide Plume (10) | GOK4BGD04IJ7T3_length_502_xy_3393_2585_region_4_run_R_2011_04_06_07_55_54_0 |
| DsrA-SOB | ETSP Sulfide Plume (10) | GOK4BGD04IKJWH_length_450_xy_3397_1839_region_4_run_R_2011_04_06_07_55_54_0 |
| DsrA-SOB | ETSP Sulfide Plume (10) | GOK4BGD04IKR9Q_length_501_xy_3400_0396_region_4_run_R_2011_04_06_07_55_54_0 |
| DsrA-SOB | ETSP Sulfide Plume (10) | GOK4BGD04IL8O3_length_476_xy_3416_2805_region_4_run_R_2011_04_06_07_55_54_0 |
| DsrA-SOB | ETSP Sulfide Plume (10) | GOK4BGD04IMTRK_length_495_xy_3423_1438_region_4_run_R_2011_04_06_07_55_54_0 |
| DsrA-SOB | ETSP Sulfide Plume (10) | GOK4BGD04INLJG_length_503_xy_3432_0465_region_4_run_R_2011_04_06_07_55_54_0 |
| DsrA-SOB | ETSP Sulfide Plume (10) | GOK4BGD04IOVDH_length_480_xy_3446_2627_region_4_run_R_2011_04_06_07_55_54_0 |
| DsrA-SOB | ETSP Sulfide Plume (10) | GOK4BGD04IQ2TG_length_464_xy_3471_3186_region_4_run_R_2011_04_06_07_55_54_0 |
| DsrA-SOB | ETSP Sulfide Plume (10) | GOK4BGD04IQLDG_length_474_xy_3466_1058_region_4_run_R_2011_04_06_07_55_54_0 |
| DsrA-SOB | ETSP Sulfide Plume (10) | GOK4BGD04IQXT2_length_497_xy_3470_0824_region_4_run_R_2011_04_06_07_55_54_0 |
| DsrA-SOB | ETSP Sulfide Plume (10) | GOK4BGD04IQYT3_length_431_xy_3470_2121_region_4_run_R_2011_04_06_07_55_54_0 |
| DsrA-SOB | ETSP Sulfide Plume (10) | GOK4BGD04IR6VS_length_422_xy_3484_1862_region_4_run_R_2011_04_06_07_55_54_0 |
| DsrA-SOB | ETSP Sulfide Plume (10) | GOK4BGD04IRA8V_length_439_xy_3474_1821_region_4_run_R_2011_04_06_07_55_54_0 |
| DsrA-SOB | ETSP Sulfide Plume (10) | GOK4BGD04IRGGN_length_485_xy_3476_0389_region_4_run_R_2011_04_06_07_55_54_0 |

|          |                         |                                                                             |
|----------|-------------------------|-----------------------------------------------------------------------------|
| DsrA-SOB | ETSP Sulfide Plume (10) | GOK4BGD04IRKMJ_length_482_xy_3477_1689_region_4_run_R_2011_04_06_07_55_54_0 |
| DsrA-SOB | ETSP Sulfide Plume (10) | GOK4BGD04IRN70_length_465_xy_3478_2254_region_4_run_R_2011_04_06_07_55_54_0 |
| DsrA-SOB | ETSP Sulfide Plume (10) | GOK4BGD04IRNSW_length_405_xy_3478_1710_region_4_run_R_2011_04_06_07_55_54_0 |
| DsrA-SOB | ETSP Sulfide Plume (10) | GOK4BGD04IS6WS_length_429_xy_3495_3498_region_4_run_R_2011_04_06_07_55_54_0 |
| DsrA-SOB | ETSP Sulfide Plume (10) | GOK4BGD04IS8YP_length_278_xy_3496_2063_region_4_run_R_2011_04_06_07_55_54_0 |
| DsrA-SOB | ETSP Sulfide Plume (10) | GOK4BGD04ISAY2_length_166_xy_3485_3068_region_4_run_R_2011_04_06_07_55_54_0 |
| DsrA-SOB | ETSP Sulfide Plume (10) | GOK4BGD04IT7VZ_length_464_xy_3507_2269_region_4_run_R_2011_04_06_07_55_54_0 |
| DsrA-SOB | ETSP Sulfide Plume (10) | GOK4BGD04ITPUW_length_464_xy_3501_3478_region_4_run_R_2011_04_06_07_55_54_0 |
| DsrA-SOB | ETSP Sulfide Plume (10) | GOK4BGD04ITSRT_length_193_xy_3502_3159_region_4_run_R_2011_04_06_07_55_54_0 |
| DsrA-SOB | ETSP Sulfide Plume (10) | GOK4BGD04IU7EB_length_500_xy_3518_3233_region_4_run_R_2011_04_06_07_55_54_0 |
| DsrA-SOB | ETSP Sulfide Plume (10) | GOK4BGD04IURIQ_length_515_xy_3513_3136_region_4_run_R_2011_04_06_07_55_54_0 |
| DsrA-SOB | ETSP Sulfide Plume (10) | GOK4BGD04IVN8R_length_487_xy_3524_0489_region_4_run_R_2011_04_06_07_55_54_0 |
| DsrA-SOB | ETSP Sulfide Plume (10) | GOK4BGD04IW5ZR_length_490_xy_3541_0517_region_4_run_R_2011_04_06_07_55_54_0 |
| DsrA-SOB | ETSP Sulfide Plume (10) | GOK4BGD04IWO43_length_426_xy_3535_3253_region_4_run_R_2011_04_06_07_55_54_0 |
| DsrA-SOB | ETSP Sulfide Plume (10) | GOK4BGD04IWZ08_length_441_xy_3539_0986_region_4_run_R_2011_04_06_07_55_54_0 |
| DsrA-SOB | ETSP Sulfide Plume (10) | GOK4BGD04IXQL0_length_493_xy_3547_2662_region_4_run_R_2011_04_06_07_55_54_0 |
| DsrA-SOB | ETSP Sulfide Plume (10) | GOK4BGD04IXQLK_length_453_xy_3547_2646_region_4_run_R_2011_04_06_07_55_54_0 |
| DsrA-SOB | ETSP Sulfide Plume (10) | GOK4BGD04IYESO_length_499_xy_3555_1238_region_4_run_R_2011_04_06_07_55_54_0 |
| DsrA-SOB | ETSP Sulfide Plume (10) | GOK4BGD04IYFE3_length_514_xy_3555_2045_region_4_run_R_2011_04_06_07_55_54_0 |
| DsrA-SOB | ETSP Sulfide Plume (10) | GOK4BGD04IZKPM_length_491_xy_3568_2312_region_4_run_R_2011_04_06_07_55_54_0 |
| DsrA-SOB | ETSP Sulfide Plume (10) | GOK4BGD04IZOD8_length_435_xy_3569_2990_region_4_run_R_2011_04_06_07_55_54_0 |
| DsrA-SOB | ETSP Sulfide Plume (10) | GOK4BGD04JA3LE_length_489_xy_3699_3424_region_4_run_R_2011_04_06_07_55_54_0 |
| DsrA-SOB | ETSP Sulfide Plume (10) | GOK4BGD04JA75A_length_475_xy_3701_1132_region_4_run_R_2011_04_06_07_55_54_0 |
| DsrA-SOB | ETSP Sulfide Plume (10) | GOK4BGD04JAFTJ_length_504_xy_3692_1285_region_4_run_R_2011_04_06_07_55_54_0 |
| DsrA-SOB | ETSP Sulfide Plume (10) | GOK4BGD04JAHRO_length_250_xy_3692_3810_region_4_run_R_2011_04_06_07_55_54_0 |
| DsrA-SOB | ETSP Sulfide Plume (10) | GOK4BGD04JANC3_length_397_xy_3694_2869_region_4_run_R_2011_04_06_07_55_54_0 |
| DsrA-SOB | ETSP Sulfide Plume (10) | GOK4BGD04JC5HL_length_478_xy_3723_0887_region_4_run_R_2011_04_06_07_55_54_0 |

|          |                         |                                                                             |
|----------|-------------------------|-----------------------------------------------------------------------------|
| DsrA-SOB | ETSP Sulfide Plume (10) | GOK4BGD04JCIY7_length_489_xy_3716_0385_region_4_run_R_2011_04_06_07_55_54_0 |
| DsrA-SOB | ETSP Sulfide Plume (10) | GOK4BGD04JCJB_length_495_xy_3716_0829_region_4_run_R_2011_04_06_07_55_54_0  |
| DsrA-SOB | ETSP Sulfide Plume (10) | GOK4BGD04JDSV4_length_263_xy_3730_2546_region_4_run_R_2011_04_06_07_55_54_0 |
| DsrA-SOB | ETSP Sulfide Plume (10) | GOK4BGD04JF8TC_length_386_xy_3758_1806_region_4_run_R_2011_04_06_07_55_54_0 |
| DsrA-SOB | ETSP Sulfide Plume (10) | GOK4BGD04JH3GG_length_498_xy_3779_2158_region_4_run_R_2011_04_06_07_55_54_0 |
| DsrA-SOB | ETSP Sulfide Plume (10) | GOK4BGD04JHI3P_length_493_xy_3773_0355_region_4_run_R_2011_04_06_07_55_54_0 |
| DsrA-SOB | ETSP Sulfide Plume (10) | GOK4BGD04JHOIS_length_436_xy_3774_3282_region_4_run_R_2011_04_06_07_55_54_0 |
| DsrA-SOB | ETSP Sulfide Plume (10) | GOK4BGD04JI3GI_length_498_xy_3790_3760_region_4_run_R_2011_04_06_07_55_54_0 |
| DsrA-SOB | ETSP Sulfide Plume (10) | GOK4BGD04JI840_length_460_xy_3792_2930_region_4_run_R_2011_04_06_07_55_54_0 |
| DsrA-SOB | ETSP Sulfide Plume (10) | GOK4BGD04JIVMO_length_394_xy_3788_1806_region_4_run_R_2011_04_06_07_55_54_0 |
| DsrA-SOB | ETSP Sulfide Plume (10) | GOK4BGD04JK0JB_length_443_xy_3812_3173_region_4_run_R_2011_04_06_07_55_54_0 |
| DsrA-SOB | ETSP Sulfide Plume (10) | GOK4BGD04JKUBT_length_466_xy_3810_3319_region_4_run_R_2011_04_06_07_55_54_0 |
| DsrA-SOB | ETSP Sulfide Plume (10) | GOK4BGD04JKWED_length_337_xy_3811_1907_region_4_run_R_2011_04_06_07_55_54_0 |
| DsrA-SOB | ETSP Sulfide Plume (10) | GOK4BGD04JL057_length_487_xy_3824_1501_region_4_run_R_2011_04_06_07_55_54_0 |
| DsrA-SOB | ETSP Sulfide Plume (10) | GOK4BGD04JLW6Q_length_504_xy_3823_0432_region_4_run_R_2011_04_06_07_55_54_0 |
| DsrA-SOB | ETSP Sulfide Plume (10) | GOK4BGD04JM7PM_length_428_xy_3837_3384_region_4_run_R_2011_04_06_07_55_54_0 |
| DsrA-SOB | ETSP Sulfide Plume (10) | GOK4BGD04JMM2P_length_394_xy_3831_1215_region_4_run_R_2011_04_06_07_55_54_0 |
| DsrA-SOB | ETSP Sulfide Plume (10) | GOK4BGD04JN494_length_504_xy_3848_1834_region_4_run_R_2011_04_06_07_55_54_0 |
| DsrA-SOB | ETSP Sulfide Plume (10) | GOK4BGD04JN4LP_length_452_xy_3848_0955_region_4_run_R_2011_04_06_07_55_54_0 |
| DsrA-SOB | ETSP Sulfide Plume (10) | GOK4BGD04JNI7P_length_427_xy_3841_1907_region_4_run_R_2011_04_06_07_55_54_0 |
| DsrA-SOB | ETSP Sulfide Plume (10) | GOK4BGD04JNPBC_length_406_xy_3843_1622_region_4_run_R_2011_04_06_07_55_54_0 |
| DsrA-SOB | ETSP Sulfide Plume (10) | GOK4BGD04JO169_length_402_xy_3858_3539_region_4_run_R_2011_04_06_07_55_54_0 |
| DsrA-SOB | ETSP Sulfide Plume (10) | GOK4BGD04JOLF7_length_483_xy_3853_2309_region_4_run_R_2011_04_06_07_55_54_0 |
| DsrA-SOB | ETSP Sulfide Plume (10) | GOK4BGD04JOVZB_length_476_xy_3856_3669_region_4_run_R_2011_04_06_07_55_54_0 |
| DsrA-SOB | ETSP Sulfide Plume (10) | GOK4BGD04JPHCA_length_347_xy_3863_2680_region_4_run_R_2011_04_06_07_55_54_0 |
| DsrA-SOB | ETSP Sulfide Plume (10) | GOK4BGD04JQ8GK_length_507_xy_3883_2562_region_4_run_R_2011_04_06_07_55_54_0 |
| DsrA-SOB | ETSP Sulfide Plume (10) | GOK4BGD04JQIG7_length_407_xy_3875_1657_region_4_run_R_2011_04_06_07_55_54_0 |



|          |                         |                                                                             |
|----------|-------------------------|-----------------------------------------------------------------------------|
| DsrA-SOB | ETSP Sulfide Plume (10) | GOK4BGD04JRJCK_length_444_xy_3887_0290_region_4_run_R_2011_04_06_07_55_54_0 |
| DsrA-SOB | ETSP Sulfide Plume (10) | GOK4BGD04JROFO_length_437_xy_3888_2786_region_4_run_R_2011_04_06_07_55_54_0 |
| DsrA-SOB | ETSP Sulfide Plume (10) | GOK4BGD04JSXZU_length_383_xy_3903_0392_region_4_run_R_2011_04_06_07_55_54_0 |
| DsrA-SOB | ETSP Sulfide Plume (10) | GOK4BGD04JU0TG_length_495_xy_3926_3154_region_4_run_R_2011_04_06_07_55_54_0 |
| DsrA-SOB | ETSP Sulfide Plume (10) | GOK4BGD04JUWAE_length_472_xy_3925_1380_region_4_run_R_2011_04_06_07_55_54_0 |
| DsrA-SOB | ETSP Sulfide Plume (10) | GOK4BGD04JV09X_length_504_xy_3938_1251_region_4_run_R_2011_04_06_07_55_54_0 |
| DsrA-SOB | ETSP Sulfide Plume (10) | GOK4BGD04JX59T_length_411_xy_3962_2735_region_4_run_R_2011_04_06_07_55_54_0 |
| DsrA-SOB | ETSP Sulfide Plume (10) | GOK4BGD04JXHPQ_length_466_xy_3954_3676_region_4_run_R_2011_04_06_07_55_54_0 |
| DsrA-SOB | ETSP Sulfide Plume (10) | GOK4BGD04JXPFS_length_289_xy_3957_1398_region_4_run_R_2011_04_06_07_55_54_0 |
| DsrA-SOB | ETSP Sulfide Plume (10) | GOK4BGD04JYHRU_length_388_xy_3966_1256_region_4_run_R_2011_04_06_07_55_54_0 |
| DsrA-SOB | ETSP Sulfide Plume (10) | GOK4BGD04JYKSY_length_496_xy_3967_1088_region_4_run_R_2011_04_06_07_55_54_0 |
| DsrA-SOB | ETSP Sulfide Plume (10) | GOK4BGD04JZ20P_length_393_xy_3984_1719_region_4_run_R_2011_04_06_07_55_54_0 |
| DsrA-SOB | ETSP Sulfide Plume (10) | GPIPG5Q02C3PA6_length_501_xy_1155_0848_region_2_run_R_2010_10_15_04_30_31_0 |
| DsrA-SOB | ETSP Sulfide Plume (10) | GPIPG5Q02CXM75_length_373_xy_1086_0835_region_2_run_R_2010_10_15_04_30_31_0 |
| DsrA-SOB | ETSP Sulfide Plume (10) | GPIPG5Q02DLXPV_length_499_xy_1362_3681_region_2_run_R_2010_10_15_04_30_31_0 |
| DsrA-SOB | ETSP Sulfide Plume (10) | GPIPG5Q02DY77G_length_229_xy_1514_1210_region_2_run_R_2010_10_15_04_30_31_0 |
| DsrA-SOB | ETSP Sulfide Plume (10) | GPIPG5Q02EC1DU_length_338_xy_1671_2480_region_2_run_R_2010_10_15_04_30_31_0 |
| DsrA-SOB | ETSP Sulfide Plume (10) | GPIPG5Q02ECGQU_length_377_xy_1665_0308_region_2_run_R_2010_10_15_04_30_31_0 |
| DsrA-SOB | ETSP Sulfide Plume (10) | GPIPG5Q02EECU0_length_414_xy_1686_2570_region_2_run_R_2010_10_15_04_30_31_0 |
| DsrA-SOB | ETSP Sulfide Plume (10) | GPIPG5Q02EFILF_length_420_xy_1699_3409_region_2_run_R_2010_10_15_04_30_31_0 |
| DsrA-SOB | ETSP Sulfide Plume (10) | GPIPG5Q03F0S9R_length_479_xy_2352_1949_region_3_run_R_2010_10_15_04_30_31_0 |
| DsrA-SOB | ETSP Sulfide Plume (10) | GPIPG5Q03F66Q7_length_447_xy_2425_0353_region_3_run_R_2010_10_15_04_30_31_0 |
| DsrA-SOB | ETSP Sulfide Plume (10) | GPIPG5Q03F7U5I_length_430_xy_2432_3300_region_3_run_R_2010_10_15_04_30_31_0 |
| DsrA-SOB | ETSP Sulfide Plume (10) | GPIPG5Q03F8UTG_length_499_xy_2444_0370_region_3_run_R_2010_10_15_04_30_31_0 |
| DsrA-SOB | ETSP Sulfide Plume (10) | GPIPG5Q03F99KF_length_477_xy_2460_0605_region_3_run_R_2010_10_15_04_30_31_0 |
| DsrA-SOB | ETSP Sulfide Plume (10) | GPIPG5Q03FHGY0_length_295_xy_2132_0666_region_3_run_R_2010_10_15_04_30_31_0 |
| DsrA-SOB | ETSP Sulfide Plume (10) | GPIPG5Q03FJUHO_length_502_xy_2159_0906_region_3_run_R_2010_10_15_04_30_31_0 |

|          |                         |                                                                             |
|----------|-------------------------|-----------------------------------------------------------------------------|
| DsrA-SOB | ETSP Sulfide Plume (10) | GPIPG5Q03FM7C3_length_406_xy_2197_1909_region_3_run_R_2010_10_15_04_30_31_0 |
| DsrA-SOB | ETSP Sulfide Plume (10) | GPIPG5Q03FMUO0_length_513_xy_2193_1874_region_3_run_R_2010_10_15_04_30_31_0 |
| DsrA-SOB | ETSP Sulfide Plume (10) | GPIPG5Q03FN56L_length_461_xy_2208_1979_region_3_run_R_2010_10_15_04_30_31_0 |
| DsrA-SOB | ETSP Sulfide Plume (10) | GPIPG5Q03FNG65_length_205_xy_2200_2367_region_3_run_R_2010_10_15_04_30_31_0 |
| DsrA-SOB | ETSP Sulfide Plume (10) | GPIPG5Q03FOBHO_length_311_xy_2210_0666_region_3_run_R_2010_10_15_04_30_31_0 |
| DsrA-SOB | ETSP Sulfide Plume (10) | GPIPG5Q03FP1RI_length_218_xy_2229_3548_region_3_run_R_2010_10_15_04_30_31_0 |
| DsrA-SOB | ETSP Sulfide Plume (10) | GPIPG5Q03FPDR4_length_418_xy_2222_1138_region_3_run_R_2010_10_15_04_30_31_0 |
| DsrA-SOB | ETSP Sulfide Plume (10) | GPIPG5Q03FQ166_length_261_xy_2241_1616_region_3_run_R_2010_10_15_04_30_31_0 |
| DsrA-SOB | ETSP Sulfide Plume (10) | GPIPG5Q03FQIJD_length_340_xy_2235_0711_region_3_run_R_2010_10_15_04_30_31_0 |
| DsrA-SOB | ETSP Sulfide Plume (10) | GPIPG5Q03FS7HZ_length_463_xy_2265_3493_region_3_run_R_2010_10_15_04_30_31_0 |
| DsrA-SOB | ETSP Sulfide Plume (10) | GPIPG5Q03FUDEM_length_489_xy_2279_0460_region_3_run_R_2010_10_15_04_30_31_0 |
| DsrA-SOB | ETSP Sulfide Plume (10) | GPIPG5Q03FUUX1_length_495_xy_2284_2711_region_3_run_R_2010_10_15_04_30_31_0 |
| DsrA-SOB | ETSP Sulfide Plume (10) | GPIPG5Q03FVMUY_length_466_xy_2293_2024_region_3_run_R_2010_10_15_04_30_31_0 |
| DsrA-SOB | ETSP Sulfide Plume (10) | GPIPG5Q03FYNAR_length_331_xy_2327_3297_region_3_run_R_2010_10_15_04_30_31_0 |
| DsrA-SOB | ETSP Sulfide Plume (10) | GPIPG5Q03FYRIC_length_497_xy_2329_0562_region_3_run_R_2010_10_15_04_30_31_0 |
| DsrA-SOB | ETSP Sulfide Plume (10) | GPIPG5Q03FZ18N_length_298_xy_2343_3781_region_3_run_R_2010_10_15_04_30_31_0 |
| DsrA-SOB | ETSP Sulfide Plume (10) | GPIPG5Q03G0TOR_length_517_xy_2762_3177_region_3_run_R_2010_10_15_04_30_31_0 |
| DsrA-SOB | ETSP Sulfide Plume (10) | GPIPG5Q03G2PK3_length_511_xy_2784_0629_region_3_run_R_2010_10_15_04_30_31_0 |
| DsrA-SOB | ETSP Sulfide Plume (10) | GPIPG5Q03G3F67_length_466_xy_2792_2353_region_3_run_R_2010_10_15_04_30_31_0 |
| DsrA-SOB | ETSP Sulfide Plume (10) | GPIPG5Q03G3FU1_length_509_xy_2792_1915_region_3_run_R_2010_10_15_04_30_31_0 |
| DsrA-SOB | ETSP Sulfide Plume (10) | GPIPG5Q03G4350_length_186_xy_2811_2246_region_3_run_R_2010_10_15_04_30_31_0 |
| DsrA-SOB | ETSP Sulfide Plume (10) | GPIPG5Q03G7EAP_length_491_xy_2837_2191_region_3_run_R_2010_10_15_04_30_31_0 |
| DsrA-SOB | ETSP Sulfide Plume (10) | GPIPG5Q03GCC61_length_337_xy_2484_0315_region_3_run_R_2010_10_15_04_30_31_0 |
| DsrA-SOB | ETSP Sulfide Plume (10) | GPIPG5Q03GE106_length_405_xy_2514_2504_region_3_run_R_2010_10_15_04_30_31_0 |
| DsrA-SOB | ETSP Sulfide Plume (10) | GPIPG5Q03GF43E_length_490_xy_2527_0312_region_3_run_R_2010_10_15_04_30_31_0 |
| DsrA-SOB | ETSP Sulfide Plume (10) | GPIPG5Q03GGRGH_length_459_xy_2534_0623_region_3_run_R_2010_10_15_04_30_31_0 |
| DsrA-SOB | ETSP Sulfide Plume (10) | GPIPG5Q03GINJU_length_415_xy_2555_2856_region_3_run_R_2010_10_15_04_30_31_0 |

|          |                         |                                                                             |
|----------|-------------------------|-----------------------------------------------------------------------------|
| DsrA-SOB | ETSP Sulfide Plume (10) | GPIPG5Q03GJK8N_length_469_xy_2566_1461_region_3_run_R_2010_10_15_04_30_31_0 |
| DsrA-SOB | ETSP Sulfide Plume (10) | GPIPG5Q03GN62K_length_324_xy_2618_3386_region_3_run_R_2010_10_15_04_30_31_0 |
| DsrA-SOB | ETSP Sulfide Plume (10) | GPIPG5Q03GPDA9_length_477_xy_2632_0787_region_3_run_R_2010_10_15_04_30_31_0 |
| DsrA-SOB | ETSP Sulfide Plume (10) | GPIPG5Q03GQSTV_length_463_xy_2648_2017_region_3_run_R_2010_10_15_04_30_31_0 |
| DsrA-SOB | ETSP Sulfide Plume (10) | GPIPG5Q03GR7EK_length_492_xy_2664_2026_region_3_run_R_2010_10_15_04_30_31_0 |
| DsrA-SOB | ETSP Sulfide Plume (10) | GPIPG5Q03GTVZ8_length_432_xy_2683_2742_region_3_run_R_2010_10_15_04_30_31_0 |
| DsrA-SOB | ETSP Sulfide Plume (10) | GPIPG5Q03GVI5Z_length_440_xy_2702_1589_region_3_run_R_2010_10_15_04_30_31_0 |
| DsrA-SOB | ETSP Sulfide Plume (10) | GPIPG5Q03GZ2YS_length_405_xy_2754_0882_region_3_run_R_2010_10_15_04_30_31_0 |
| DsrA-SOB | ETSP Sulfide Plume (10) | GPIPG5Q04H04ZB_length_456_xy_3176_1253_region_4_run_R_2010_10_15_04_30_31_0 |
| DsrA-SOB | ETSP Sulfide Plume (10) | GPIPG5Q04H0JKO_length_225_xy_3169_2182_region_4_run_R_2010_10_15_04_30_31_0 |
| DsrA-SOB | ETSP Sulfide Plume (10) | GPIPG5Q04H2LFO_length_264_xy_3192_3698_region_4_run_R_2010_10_15_04_30_31_0 |
| DsrA-SOB | ETSP Sulfide Plume (10) | GPIPG5Q04H2NDB_length_305_xy_3193_2109_region_4_run_R_2010_10_15_04_30_31_0 |
| DsrA-SOB | ETSP Sulfide Plume (10) | GPIPG5Q04H2ZUZ_length_378_xy_3197_1913_region_4_run_R_2010_10_15_04_30_31_0 |
| DsrA-SOB | ETSP Sulfide Plume (10) | GPIPG5Q04H3HWO_length_198_xy_3203_0726_region_4_run_R_2010_10_15_04_30_31_0 |
| DsrA-SOB | ETSP Sulfide Plume (10) | GPIPG5Q04H4EVC_length_394_xy_3213_2486_region_4_run_R_2010_10_15_04_30_31_0 |
| DsrA-SOB | ETSP Sulfide Plume (10) | GPIPG5Q04H7J7Q_length_370_xy_3249_1924_region_4_run_R_2010_10_15_04_30_31_0 |
| DsrA-SOB | ETSP Sulfide Plume (10) | GPIPG5Q04HWIBF_length_457_xy_3123_2345_region_4_run_R_2010_10_15_04_30_31_0 |
| DsrA-SOB | ETSP Sulfide Plume (10) | GPIPG5Q04I1RJE_length_438_xy_3593_2072_region_4_run_R_2010_10_15_04_30_31_0 |
| DsrA-SOB | ETSP Sulfide Plume (10) | GPIPG5Q04I3LP3_length_423_xy_3614_1833_region_4_run_R_2010_10_15_04_30_31_0 |
| DsrA-SOB | ETSP Sulfide Plume (10) | GPIPG5Q04I7Z6L_length_330_xy_3664_2395_region_4_run_R_2010_10_15_04_30_31_0 |
| DsrA-SOB | ETSP Sulfide Plume (10) | GPIPG5Q04IAO3Q_length_367_xy_3285_0772_region_4_run_R_2010_10_15_04_30_31_0 |
| DsrA-SOB | ETSP Sulfide Plume (10) | GPIPG5Q04IBYNR_length_413_xy_3299_2469_region_4_run_R_2010_10_15_04_30_31_0 |
| DsrA-SOB | ETSP Sulfide Plume (10) | GPIPG5Q04IEACG_length_446_xy_3326_0334_region_4_run_R_2010_10_15_04_30_31_0 |
| DsrA-SOB | ETSP Sulfide Plume (10) | GPIPG5Q04IEQAD_length_245_xy_3331_0515_region_4_run_R_2010_10_15_04_30_31_0 |
| DsrA-SOB | ETSP Sulfide Plume (10) | GPIPG5Q04IF10P_length_494_xy_3346_0935_region_4_run_R_2010_10_15_04_30_31_0 |
| DsrA-SOB | ETSP Sulfide Plume (10) | GPIPG5Q04IFNUL_length_465_xy_3341_3051_region_4_run_R_2010_10_15_04_30_31_0 |
| DsrA-SOB | ETSP Sulfide Plume (10) | GPIPG5Q04II2S3_length_502_xy_3380_2661_region_4_run_R_2010_10_15_04_30_31_0 |

|          |                         |                                                                             |
|----------|-------------------------|-----------------------------------------------------------------------------|
| DsrA-SOB | ETSP Sulfide Plume (10) | GPIPG5Q04IJ9SA_length_491_xy_3394_1016_region_4_run_R_2010_10_15_04_30_31_0 |
| DsrA-SOB | ETSP Sulfide Plume (10) | GPIPG5Q04IJIH_length_427_xy_3385_2571_region_4_run_R_2010_10_15_04_30_31_0  |
| DsrA-SOB | ETSP Sulfide Plume (10) | GPIPG5Q04IY47_length_504_xy_3390_3609_region_4_run_R_2010_10_15_04_30_31_0  |
| DsrA-SOB | ETSP Sulfide Plume (10) | GPIPG5Q04IL42R_length_410_xy_3415_2209_region_4_run_R_2010_10_15_04_30_31_0 |
| DsrA-SOB | ETSP Sulfide Plume (10) | GPIPG5Q04ILOEG_length_411_xy_3410_1078_region_4_run_R_2010_10_15_04_30_31_0 |
| DsrA-SOB | ETSP Sulfide Plume (10) | GPIPG5Q04ILRLV_length_248_xy_3411_1137_region_4_run_R_2010_10_15_04_30_31_0 |
| DsrA-SOB | ETSP Sulfide Plume (10) | GPIPG5Q04IP3IU_length_500_xy_3460_2500_region_4_run_R_2010_10_15_04_30_31_0 |
| DsrA-SOB | ETSP Sulfide Plume (10) | GPIPG5Q04IPDQB_length_409_xy_3452_1841_region_4_run_R_2010_10_15_04_30_31_0 |
| DsrA-SOB | ETSP Sulfide Plume (10) | GPIPG5Q04IPZVE_length_484_xy_3459_1864_region_4_run_R_2010_10_15_04_30_31_0 |
| DsrA-SOB | ETSP Sulfide Plume (10) | GPIPG5Q04IR4H6_length_424_xy_3483_2876_region_4_run_R_2010_10_15_04_30_31_0 |
| DsrA-SOB | ETSP Sulfide Plume (10) | GPIPG5Q04ISWRV_length_484_xy_3492_2652_region_4_run_R_2010_10_15_04_30_31_0 |
| DsrA-SOB | ETSP Sulfide Plume (10) | GPIPG5Q04IUQSQ_length_210_xy_3513_2200_region_4_run_R_2010_10_15_04_30_31_0 |
| DsrA-SOB | ETSP Sulfide Plume (10) | GPIPG5Q04IV3XX_length_414_xy_3529_0355_region_4_run_R_2010_10_15_04_30_31_0 |
| DsrA-SOB | ETSP Sulfide Plume (10) | GPIPG5Q04IVL5J_length_474_xy_3523_1877_region_4_run_R_2010_10_15_04_30_31_0 |
| DsrA-SOB | ETSP Sulfide Plume (10) | GPIPG5Q04IWIAP_length_424_xy_3533_2575_region_4_run_R_2010_10_15_04_30_31_0 |
| DsrA-SOB | ETSP Sulfide Plume (10) | GPIPG5Q04IYAAS_length_378_xy_3553_3602_region_4_run_R_2010_10_15_04_30_31_0 |
| DsrA-SOB | ETSP Sulfide Plume (10) | GPIPG5Q04IYB1X_length_358_xy_3554_1779_region_4_run_R_2010_10_15_04_30_31_0 |
| DsrA-SOB | ETSP Sulfide Plume (10) | GPIPG5Q04JABBE_length_337_xy_3690_3640_region_4_run_R_2010_10_15_04_30_31_0 |
| DsrA-SOB | ETSP Sulfide Plume (10) | GPIPG5Q04JCC0E_length_328_xy_3714_0844_region_4_run_R_2010_10_15_04_30_31_0 |
| DsrA-SOB | ETSP Sulfide Plume (10) | GPIPG5Q04JEN6Z_length_304_xy_3740_2153_region_4_run_R_2010_10_15_04_30_31_0 |
| DsrA-SOB | ETSP Sulfide Plume (10) | GPIPG5Q04JFHNG_length_382_xy_3749_3466_region_4_run_R_2010_10_15_04_30_31_0 |
| DsrA-SOB | ETSP Sulfide Plume (10) | GPIPG5Q04JG19T_length_430_xy_3767_3119_region_4_run_R_2010_10_15_04_30_31_0 |
| DsrA-SOB | ETSP Sulfide Plume (10) | GPIPG5Q04JG6F2_length_494_xy_3769_0336_region_4_run_R_2010_10_15_04_30_31_0 |
| DsrA-SOB | ETSP Sulfide Plume (10) | GPIPG5Q04JICMW_length_426_xy_3782_1766_region_4_run_R_2010_10_15_04_30_31_0 |
| DsrA-SOB | ETSP Sulfide Plume (10) | GPIPG5Q04JKXAW_length_320_xy_3811_3078_region_4_run_R_2010_10_15_04_30_31_0 |
| DsrA-SOB | ETSP Sulfide Plume (10) | GPIPG5Q04JL3C9_length_403_xy_3825_0251_region_4_run_R_2010_10_15_04_30_31_0 |
| DsrA-SOB | ETSP Sulfide Plume (10) | GPIPG5Q04JLEM8_length_328_xy_3817_0978_region_4_run_R_2010_10_15_04_30_31_0 |

|          |                         |                                                                             |
|----------|-------------------------|-----------------------------------------------------------------------------|
| DsrA-SOB | ETSP Sulfide Plume (10) | GPIPG5Q04JLOZJ_length_481_xy_3820_2093_region_4_run_R_2010_10_15_04_30_31_0 |
| DsrA-SOB | ETSP Sulfide Plume (10) | GPIPG5Q04JNH8O_length_432_xy_3841_0646_region_4_run_R_2010_10_15_04_30_31_0 |
| DsrA-SOB | ETSP Sulfide Plume (10) | GPIPG5Q04JO1M6_length_445_xy_3858_2816_region_4_run_R_2010_10_15_04_30_31_0 |
| DsrA-SOB | ETSP Sulfide Plume (10) | GPIPG5Q04JQFYR_length_403_xy_3874_2497_region_4_run_R_2010_10_15_04_30_31_0 |
| DsrA-SOB | ETSP Sulfide Plume (10) | GPIPG5Q04JRR1N_length_229_xy_3889_3369_region_4_run_R_2010_10_15_04_30_31_0 |
| DsrA-SOB | ETSP Sulfide Plume (10) | GPIPG5Q04JS9ZQ_length_467_xy_3906_3652_region_4_run_R_2010_10_15_04_30_31_0 |
| DsrA-SOB | ETSP Sulfide Plume (10) | GPIPG5Q04JT5CE_length_444_xy_3916_3324_region_4_run_R_2010_10_15_04_30_31_0 |
| DsrA-SOB | ETSP Sulfide Plume (10) | GPIPG5Q04JTV5E_length_429_xy_3913_3696_region_4_run_R_2010_10_15_04_30_31_0 |
| DsrA-SOB | ETSP Sulfide Plume (10) | GPIPG5Q04JU2CN_length_254_xy_3927_1045_region_4_run_R_2010_10_15_04_30_31_0 |
| DsrA-SOB | ETSP Sulfide Plume (10) | GPIPG5Q04JVYIE_length_482_xy_3937_1764_region_4_run_R_2010_10_15_04_30_31_0 |
| DsrA-SOB | ETSP Sulfide Plume (10) | GPIPG5Q04JXWQO_length_457_xy_3959_2670_region_4_run_R_2010_10_15_04_30_31_0 |
| DsrA-SOB | ETSP Sulfide Plume (10) | GPIPG5Q04JYKHX_length_374_xy_3967_0691_region_4_run_R_2010_10_15_04_30_31_0 |
| DsrA-SOB | ETSP Sulfide Plume (10) | GZ2L4FS02D4VAS_length_233_xy_1578_2274_region_2_run_R_2011_03_28_08_06_05_0 |
| DsrA-SOB | ETSP Sulfide Plume (10) | GZ2L4FS04H0DQL_length_503_xy_3167_2811_region_4_run_R_2011_03_28_08_06_05_0 |
| DsrA-SOB | ETSP Sulfide Plume (10) | GZ2L4FS04H0O5F_length_497_xy_3171_1217_region_4_run_R_2011_03_28_08_06_05_0 |
| DsrA-SOB | ETSP Sulfide Plume (10) | GZ2L4FS04H147B_length_459_xy_3187_3141_region_4_run_R_2011_03_28_08_06_05_0 |
| DsrA-SOB | ETSP Sulfide Plume (10) | GZ2L4FS04H151C_length_493_xy_3187_3538_region_4_run_R_2011_03_28_08_06_05_0 |
| DsrA-SOB | ETSP Sulfide Plume (10) | GZ2L4FS04H17T3_length_479_xy_3188_2457_region_4_run_R_2011_03_28_08_06_05_0 |
| DsrA-SOB | ETSP Sulfide Plume (10) | GZ2L4FS04H19VN_length_180_xy_3189_1009_region_4_run_R_2011_03_28_08_06_05_0 |
| DsrA-SOB | ETSP Sulfide Plume (10) | GZ2L4FS04H1I0L_length_457_xy_3180_3059_region_4_run_R_2011_03_28_08_06_05_0 |
| DsrA-SOB | ETSP Sulfide Plume (10) | GZ2L4FS04H1UWR_length_467_xy_3184_2089_region_4_run_R_2011_03_28_08_06_05_0 |
| DsrA-SOB | ETSP Sulfide Plume (10) | GZ2L4FS04H1XP6_length_455_xy_3185_1644_region_4_run_R_2011_03_28_08_06_05_0 |
| DsrA-SOB | ETSP Sulfide Plume (10) | GZ2L4FS04H2BF0_length_301_xy_3189_3038_region_4_run_R_2011_03_28_08_06_05_0 |
| DsrA-SOB | ETSP Sulfide Plume (10) | GZ2L4FS04H2SB0_length_501_xy_3195_0350_region_4_run_R_2011_03_28_08_06_05_0 |
| DsrA-SOB | ETSP Sulfide Plume (10) | GZ2L4FS04H30Z2_length_211_xy_3209_0896_region_4_run_R_2011_03_28_08_06_05_0 |
| DsrA-SOB | ETSP Sulfide Plume (10) | GZ2L4FS04H3F1J_length_479_xy_3202_2405_region_4_run_R_2011_03_28_08_06_05_0 |
| DsrA-SOB | ETSP Sulfide Plume (10) | GZ2L4FS04H3JR3_length_465_xy_3203_3153_region_4_run_R_2011_03_28_08_06_05_0 |

|          |                         |                                                                             |
|----------|-------------------------|-----------------------------------------------------------------------------|
| DsrA-SOB | ETSP Sulfide Plume (10) | GZ2L4FS04H3OJX_length_477_xy_3205_1147_region_4_run_R_2011_03_28_08_06_05_0 |
| DsrA-SOB | ETSP Sulfide Plume (10) | GZ2L4FS04H3TNU_length_405_xy_3206_3672_region_4_run_R_2011_03_28_08_06_05_0 |
| DsrA-SOB | ETSP Sulfide Plume (10) | GZ2L4FS04H4IJE_length_362_xy_3214_3144_region_4_run_R_2011_03_28_08_06_05_0 |
| DsrA-SOB | ETSP Sulfide Plume (10) | GZ2L4FS04H5830_length_434_xy_3234_2318_region_4_run_R_2011_03_28_08_06_05_0 |
| DsrA-SOB | ETSP Sulfide Plume (10) | GZ2L4FS04H5XLZ_length_160_xy_3230_3797_region_4_run_R_2011_03_28_08_06_05_0 |
| DsrA-SOB | ETSP Sulfide Plume (10) | GZ2L4FS04H6K57_length_492_xy_3238_1565_region_4_run_R_2011_03_28_08_06_05_0 |
| DsrA-SOB | ETSP Sulfide Plume (10) | GZ2L4FS04H6KDF_length_221_xy_3238_0529_region_4_run_R_2011_03_28_08_06_05_0 |
| DsrA-SOB | ETSP Sulfide Plume (10) | GZ2L4FS04H7821_length_492_xy_3257_1387_region_4_run_R_2011_03_28_08_06_05_0 |
| DsrA-SOB | ETSP Sulfide Plume (10) | GZ2L4FS04H7SL6_length_493_xy_3252_0524_region_4_run_R_2011_03_28_08_06_05_0 |
| DsrA-SOB | ETSP Sulfide Plume (10) | GZ2L4FS04H8L4V_length_226_xy_3261_1917_region_4_run_R_2011_03_28_08_06_05_0 |
| DsrA-SOB | ETSP Sulfide Plume (10) | GZ2L4FS04H93LW_length_463_xy_3278_1586_region_4_run_R_2011_03_28_08_06_05_0 |
| DsrA-SOB | ETSP Sulfide Plume (10) | GZ2L4FS04HYU3M_length_337_xy_3150_1632_region_4_run_R_2011_03_28_08_06_05_0 |
| DsrA-SOB | ETSP Sulfide Plume (10) | GZ2L4FS04HZBTP_length_380_xy_3155_2827_region_4_run_R_2011_03_28_08_06_05_0 |
| DsrA-SOB | ETSP Sulfide Plume (10) | GZ2L4FS04HZGKJ_length_501_xy_3157_0785_region_4_run_R_2011_03_28_08_06_05_0 |
| DsrA-SOB | ETSP Sulfide Plume (10) | GZ2L4FS04I2DIX_length_483_xy_3600_1895_region_4_run_R_2011_03_28_08_06_05_0 |
| DsrA-SOB | ETSP Sulfide Plume (10) | GZ2L4FS04I345T_length_462_xy_3620_2447_region_4_run_R_2011_03_28_08_06_05_0 |
| DsrA-SOB | ETSP Sulfide Plume (10) | GZ2L4FS04I3Q9Q_length_484_xy_3616_0828_region_4_run_R_2011_03_28_08_06_05_0 |
| DsrA-SOB | ETSP Sulfide Plume (10) | GZ2L4FS04I3VB1_length_481_xy_3617_1999_region_4_run_R_2011_03_28_08_06_05_0 |
| DsrA-SOB | ETSP Sulfide Plume (10) | GZ2L4FS04I4284_length_466_xy_3631_1574_region_4_run_R_2011_03_28_08_06_05_0 |
| DsrA-SOB | ETSP Sulfide Plume (10) | GZ2L4FS04I4J1S_length_364_xy_3625_1262_region_4_run_R_2011_03_28_08_06_05_0 |
| DsrA-SOB | ETSP Sulfide Plume (10) | GZ2L4FS04I5LNG_length_103_xy_3637_0842_region_4_run_R_2011_03_28_08_06_05_0 |
| DsrA-SOB | ETSP Sulfide Plume (10) | GZ2L4FS04I6AQG_length_439_xy_3645_0582_region_4_run_R_2011_03_28_08_06_05_0 |
| DsrA-SOB | ETSP Sulfide Plume (10) | GZ2L4FS04I6CRI_length_476_xy_3645_3212_region_4_run_R_2011_03_28_08_06_05_0 |
| DsrA-SOB | ETSP Sulfide Plume (10) | GZ2L4FS04I6QDJ_length_472_xy_3650_0373_region_4_run_R_2011_03_28_08_06_05_0 |
| DsrA-SOB | ETSP Sulfide Plume (10) | GZ2L4FS04I7XSS_length_197_xy_3663_3402_region_4_run_R_2011_03_28_08_06_05_0 |
| DsrA-SOB | ETSP Sulfide Plume (10) | GZ2L4FS04I8886_length_378_xy_3678_3464_region_4_run_R_2011_03_28_08_06_05_0 |
| DsrA-SOB | ETSP Sulfide Plume (10) | GZ2L4FS04I8FOL_length_131_xy_3669_2003_region_4_run_R_2011_03_28_08_06_05_0 |

|          |                         |                                                                             |
|----------|-------------------------|-----------------------------------------------------------------------------|
| DsrA-SOB | ETSP Sulfide Plume (10) | GZ2L4FS04I8JW7_length_189_xy_3670_3401_region_4_run_R_2011_03_28_08_06_05_0 |
| DsrA-SOB | ETSP Sulfide Plume (10) | GZ2L4FS04I8PTL_length_259_xy_3672_2855_region_4_run_R_2011_03_28_08_06_05_0 |
| DsrA-SOB | ETSP Sulfide Plume (10) | GZ2L4FS04I9O01_length_465_xy_3683_3427_region_4_run_R_2011_03_28_08_06_05_0 |
| DsrA-SOB | ETSP Sulfide Plume (10) | GZ2L4FS04IAIOH_length_241_xy_3283_1071_region_4_run_R_2011_03_28_08_06_05_0 |
| DsrA-SOB | ETSP Sulfide Plume (10) | GZ2L4FS04IB72Y_length_242_xy_3302_2392_region_4_run_R_2011_03_28_08_06_05_0 |
| DsrA-SOB | ETSP Sulfide Plume (10) | GZ2L4FS04IBHBZ_length_375_xy_3294_0493_region_4_run_R_2011_03_28_08_06_05_0 |
| DsrA-SOB | ETSP Sulfide Plume (10) | GZ2L4FS04IBWXE_length_498_xy_3299_0224_region_4_run_R_2011_03_28_08_06_05_0 |
| DsrA-SOB | ETSP Sulfide Plume (10) | GZ2L4FS04ICF6G_length_495_xy_3305_0598_region_4_run_R_2011_03_28_08_06_05_0 |
| DsrA-SOB | ETSP Sulfide Plume (10) | GZ2L4FS04IDGDX_length_494_xy_3316_2467_region_4_run_R_2011_03_28_08_06_05_0 |
| DsrA-SOB | ETSP Sulfide Plume (10) | GZ2L4FS04IG60X_length_142_xy_3359_0831_region_4_run_R_2011_03_28_08_06_05_0 |
| DsrA-SOB | ETSP Sulfide Plume (10) | GZ2L4FS04IG7CY_length_494_xy_3359_1264_region_4_run_R_2011_03_28_08_06_05_0 |
| DsrA-SOB | ETSP Sulfide Plume (10) | GZ2L4FS04IIXR4_length_477_xy_3379_0242_region_4_run_R_2011_03_28_08_06_05_0 |
| DsrA-SOB | ETSP Sulfide Plume (10) | GZ2L4FS04IJ5I4_length_476_xy_3392_3694_region_4_run_R_2011_03_28_08_06_05_0 |
| DsrA-SOB | ETSP Sulfide Plume (10) | GZ2L4FS04IL4MG_length_507_xy_3415_1622_region_4_run_R_2011_03_28_08_06_05_0 |
| DsrA-SOB | ETSP Sulfide Plume (10) | GZ2L4FS04ILU5F_length_472_xy_3412_1633_region_4_run_R_2011_03_28_08_06_05_0 |
| DsrA-SOB | ETSP Sulfide Plume (10) | GZ2L4FS04IMLLK_length_498_xy_3420_3142_region_4_run_R_2011_03_28_08_06_05_0 |
| DsrA-SOB | ETSP Sulfide Plume (10) | GZ2L4FS04IMS37_length_381_xy_3423_0597_region_4_run_R_2011_03_28_08_06_05_0 |
| DsrA-SOB | ETSP Sulfide Plume (10) | GZ2L4FS04INX66_length_328_xy_3436_0592_region_4_run_R_2011_03_28_08_06_05_0 |
| DsrA-SOB | ETSP Sulfide Plume (10) | GZ2L4FS04IPQSQ_length_310_xy_3456_2392_region_4_run_R_2011_03_28_08_06_05_0 |
| DsrA-SOB | ETSP Sulfide Plume (10) | GZ2L4FS04IQ1WB_length_475_xy_3471_1993_region_4_run_R_2011_03_28_08_06_05_0 |
| DsrA-SOB | ETSP Sulfide Plume (10) | GZ2L4FS04IQ79G_length_270_xy_3473_2050_region_4_run_R_2011_03_28_08_06_05_0 |
| DsrA-SOB | ETSP Sulfide Plume (10) | GZ2L4FS04IQ7XA_length_362_xy_3473_1612_region_4_run_R_2011_03_28_08_06_05_0 |
| DsrA-SOB | ETSP Sulfide Plume (10) | GZ2L4FS04IUDG5_length_323_xy_3509_1319_region_4_run_R_2011_03_28_08_06_05_0 |
| DsrA-SOB | ETSP Sulfide Plume (10) | GZ2L4FS04IUL2J_length_495_xy_3512_0169_region_4_run_R_2011_03_28_08_06_05_0 |
| DsrA-SOB | ETSP Sulfide Plume (10) | GZ2L4FS04IURH8_length_457_xy_3513_3118_region_4_run_R_2011_03_28_08_06_05_0 |
| DsrA-SOB | ETSP Sulfide Plume (10) | GZ2L4FS04IVMM8_length_173_xy_3523_2514_region_4_run_R_2011_03_28_08_06_05_0 |
| DsrA-SOB | ETSP Sulfide Plume (10) | GZ2L4FS04IW0EN_length_260_xy_3539_1469_region_4_run_R_2011_03_28_08_06_05_0 |

|          |                         |                                                                             |
|----------|-------------------------|-----------------------------------------------------------------------------|
| DsrA-SOB | ETSP Sulfide Plume (10) | GZ2L4FS04IW2Zl_length_461_xy_3540_0716_region_4_run_R_2011_03_28_08_06_05_0 |
| DsrA-SOB | ETSP Sulfide Plume (10) | GZ2L4FS04IWA62_length_473_xy_3531_1564_region_4_run_R_2011_03_28_08_06_05_0 |
| DsrA-SOB | ETSP Sulfide Plume (10) | GZ2L4FS04IWNI8_length_513_xy_3535_1170_region_4_run_R_2011_03_28_08_06_05_0 |
| DsrA-SOB | ETSP Sulfide Plume (10) | GZ2L4FS04IYIPX_length_502_xy_3556_2227_region_4_run_R_2011_03_28_08_06_05_0 |
| DsrA-SOB | ETSP Sulfide Plume (10) | GZ2L4FS04IYY93_length_396_xy_3561_3209_region_4_run_R_2011_03_28_08_06_05_0 |
| DsrA-SOB | ETSP Sulfide Plume (10) | GZ2L4FS04IYYG3_length_485_xy_3561_2165_region_4_run_R_2011_03_28_08_06_05_0 |
| DsrA-SOB | ETSP Sulfide Plume (10) | GZ2L4FS04IZWD3_length_483_xy_3572_1065_region_4_run_R_2011_03_28_08_06_05_0 |
| DsrA-SOB | ETSP Sulfide Plume (10) | GZ2L4FS04JAHFJ_length_376_xy_3692_3373_region_4_run_R_2011_03_28_08_06_05_0 |
| DsrA-SOB | ETSP Sulfide Plume (10) | GZ2L4FS04JBZYL_length_515_xy_3710_0315_region_4_run_R_2011_03_28_08_06_05_0 |
| DsrA-SOB | ETSP Sulfide Plume (10) | GZ2L4FS04JC9GA_length_464_xy_3724_1928_region_4_run_R_2011_03_28_08_06_05_0 |
| DsrA-SOB | ETSP Sulfide Plume (10) | GZ2L4FS04JCL9Q_length_483_xy_3717_0556_region_4_run_R_2011_03_28_08_06_05_0 |
| DsrA-SOB | ETSP Sulfide Plume (10) | GZ2L4FS04JDKTM_length_374_xy_3728_0280_region_4_run_R_2011_03_28_08_06_05_0 |
| DsrA-SOB | ETSP Sulfide Plume (10) | GZ2L4FS04JFONT_length_468_xy_3752_0263_region_4_run_R_2011_03_28_08_06_05_0 |
| DsrA-SOB | ETSP Sulfide Plume (10) | GZ2L4FS04JFTJ2_length_229_xy_3753_2512_region_4_run_R_2011_03_28_08_06_05_0 |
| DsrA-SOB | ETSP Sulfide Plume (10) | GZ2L4FS04JG0VD_length_457_xy_3767_1303_region_4_run_R_2011_03_28_08_06_05_0 |
| DsrA-SOB | ETSP Sulfide Plume (10) | GZ2L4FS04JG2N6_length_460_xy_3767_3636_region_4_run_R_2011_03_28_08_06_05_0 |
| DsrA-SOB | ETSP Sulfide Plume (10) | GZ2L4FS04JG6M0_length_493_xy_3769_0586_region_4_run_R_2011_03_28_08_06_05_0 |
| DsrA-SOB | ETSP Sulfide Plume (10) | GZ2L4FS04JGHSW_length_108_xy_3761_1166_region_4_run_R_2011_03_28_08_06_05_0 |
| DsrA-SOB | ETSP Sulfide Plume (10) | GZ2L4FS04JIC04_length_197_xy_3782_2278_region_4_run_R_2011_03_28_08_06_05_0 |
| DsrA-SOB | ETSP Sulfide Plume (10) | GZ2L4FS04JIMJV_length_488_xy_3785_2329_region_4_run_R_2011_03_28_08_06_05_0 |
| DsrA-SOB | ETSP Sulfide Plume (10) | GZ2L4FS04JJ1W4_length_441_xy_3801_3366_region_4_run_R_2011_03_28_08_06_05_0 |
| DsrA-SOB | ETSP Sulfide Plume (10) | GZ2L4FS04JJMS7_length_263_xy_3797_0169_region_4_run_R_2011_03_28_08_06_05_0 |
| DsrA-SOB | ETSP Sulfide Plume (10) | GZ2L4FS04JLMAM_length_386_xy_3819_2700_region_4_run_R_2011_03_28_08_06_05_0 |
| DsrA-SOB | ETSP Sulfide Plume (10) | GZ2L4FS04JQ559_length_477_xy_3882_3695_region_4_run_R_2011_03_28_08_06_05_0 |
| DsrA-SOB | ETSP Sulfide Plume (10) | GZ2L4FS04JR3MY_length_509_xy_3893_2008_region_4_run_R_2011_03_28_08_06_05_0 |
| DsrA-SOB | ETSP Sulfide Plume (10) | GZ2L4FS04JR6JN_length_450_xy_3894_1681_region_4_run_R_2011_03_28_08_06_05_0 |
| DsrA-SOB | ETSP Sulfide Plume (10) | GZ2L4FS04JTHIM_length_209_xy_3909_1116_region_4_run_R_2011_03_28_08_06_05_0 |



|          |                         |                                                                             |
|----------|-------------------------|-----------------------------------------------------------------------------|
| DsrA-SOB | ETSP Sulfide Plume (10) | GZ2L4FS04JTJ4K_length_477_xy_3910_0402_region_4_run_R_2011_03_28_08_06_05_0 |
| DsrA-SOB | ETSP Sulfide Plume (10) | GZ2L4FS04JTMKG_length_357_xy_3910_3566_region_4_run_R_2011_03_28_08_06_05_0 |
| DsrA-SOB | ETSP Sulfide Plume (10) | GZ2L4FS04JUCI7_length_474_xy_3919_0353_region_4_run_R_2011_03_28_08_06_05_0 |
| DsrA-SOB | ETSP Sulfide Plume (10) | GZ2L4FS04JUCP4_length_210_xy_3919_0602_region_4_run_R_2011_03_28_08_06_05_0 |
| DsrA-SOB | ETSP Sulfide Plume (10) | GZ2L4FS04JV62J_length_497_xy_3940_0569_region_4_run_R_2011_03_28_08_06_05_0 |
| DsrA-SOB | ETSP Sulfide Plume (10) | GZ2L4FS04JW9VJ_length_457_xy_3952_1709_region_4_run_R_2011_03_28_08_06_05_0 |
| DsrA-SOB | ETSP Sulfide Plume (10) | GZ2L4FS04JWDV8_length_457_xy_3942_1222_region_4_run_R_2011_03_28_08_06_05_0 |
| DsrA-SOB | ETSP Sulfide Plume (10) | GZ2L4FS04JYFGB_length_250_xy_3965_2345_region_4_run_R_2011_03_28_08_06_05_0 |
| DsrA-SOB | ETSP Sulfide Plume (10) | GZ2L4FS04JYHP2_length_483_xy_3966_1192_region_4_run_R_2011_03_28_08_06_05_0 |
| DsrA-SOB | ETSP Sulfide Plume (10) | GZ2L4FS04JYZ4B_length_469_xy_3972_0457_region_4_run_R_2011_03_28_08_06_05_0 |

**Table S4.** Accession identifiers for version 1 assemblies used in this work under NCBI BioProject PRJNA350692.

| <b>Assembly</b> | <b>Level</b> | <b>WGS</b>     | <b>BioSample</b> | <b>Taxonomy</b>   |
|-----------------|--------------|----------------|------------------|-------------------|
| GCA_002896075.1 | Contig       | MPLT00000000.1 | SAMN05944800     | marine metagenome |
| GCA_002896175.1 | Contig       | MPLU00000000.1 | SAMN05944801     | marine metagenome |
| GCA_002896135.1 | Contig       | MPMB00000000.1 | SAMN05944808     | marine metagenome |
| GCA_002896295.1 | Contig       | MPMA00000000.1 | SAMN05944807     | marine metagenome |
| GCA_002896095.1 | Contig       | MPLW00000000.1 | SAMN05944803     | marine metagenome |
| GCA_002896195.1 | Contig       | MPLX00000000.1 | SAMN05944804     | marine metagenome |
| GCA_002896035.1 | Contig       | MPLV00000000.1 | SAMN05944802     | marine metagenome |
| GCA_002896055.1 | Contig       | MOXS00000000.1 | SAMN05944799     | marine metagenome |
| GCA_002896275.1 | Contig       | MPLZ00000000.1 | SAMN05944806     | marine metagenome |
| GCA_002896255.1 | Contig       | MPLY00000000.1 | SAMN05944805     | marine metagenome |
| GCA_002896315.1 | Contig       | MPMD00000000.1 | SAMN05944810     | marine metagenome |
| GCA_002896115.1 | Contig       | MPMC00000000.1 | SAMN05944809     | marine metagenome |
| GCA_002896335.1 | Contig       | MPMF00000000.1 | SAMN05944812     | marine metagenome |
| GCA_002896155.1 | Contig       | MPME00000000.1 | SAMN05944811     | marine metagenome |

**Table S5.** Additional information for sequences used to construct the ArrB tree (Fig. S2). The terminal number on sequence identifiers of the extant nodes of the tree are referred to as tree reference numbers. Accession & gi number correspond to the NCBI RefSeq database.

| Tree reference number | Organism                             | Clade    | Accession      |
|-----------------------|--------------------------------------|----------|----------------|
| 1                     | <i>Alkalilimnicola_ehrlichii</i>     | ArxB     | WP_041717854.1 |
| 2                     | <i>Ectothiorhodospira_sp_PHS_1</i>   | ArxB     | WP_008932022.1 |
| 3                     | <i>Thioalkalivibrio_sp_ALM2T</i>     | ArxB     | WP_019593328.1 |
| 4                     | <i>Shewanella_putrefaciens_200</i>   | ArrB     | WP_014610143.1 |
| 5                     | <i>Ferrimonas_balearica</i>          | ArrB     | WP_013345578.1 |
| 6                     | <i>Alkaliphilus_metalliredigens</i>  | ArrB     | WP_012062250.1 |
| 7                     | <i>Desulfitobacterium_hafniense</i>  | ArrB     | WP_015943298.1 |
| 8                     | <i>Desulfurispirillum_indicum</i>    | ArrB     | WP_013505024.1 |
| 9                     | <i>Geobacter_lovleyi</i>             | ArrB     | WP_012469219.1 |
| 10                    | <i>Denitrovibrio_acetiphilus</i>     | ArrB     | WP_013011387.1 |
| 11                    | <i>Bacillus_selenitireducens</i>     | ArrB     | WP_013173527.1 |
| 12                    | <i>Sulfolobus_solfataricus</i>       | Outgroup | WP_009991948.1 |
| 13                    | gene_45_ArrA_ETNP_allDepths_contig_2 | ArrB     | KY305110       |

**Table S6.** Additional information for sequences used to construct the DMSO reductase family tree (Fig. 5A and Fig. S4), including the sequences used to construct the AioA, AioA-Like, and ArrA trees (Fig. 2A and 3A). The terminal number on sequence identifiers of the extant nodes of the tree are referred to as tree reference numbers. Accession & gi number correspond to the NCBI RefSeq database.

| Tree reference number | Organism                                             | Group on Tree | Accession      |
|-----------------------|------------------------------------------------------|---------------|----------------|
| 229                   | <i>Pelobacter_acetylenicus</i>                       | Ahy           | AAQ08379.1     |
| 231                   | <i>Bordetella_bronchiseptica_RB50</i>                | Ahy           | CAE30967.1     |
| 232                   | <i>Photorhabdus_luminescens_subsp_laumondii_TTO1</i> | Ahy           | CAE14555.1     |
| 276                   | <i>Aromatoleum_aromaticum</i>                        | Ahy           | WP_011239635.1 |
| 280                   | <i>Cupriavidus_pinatubonensis</i>                    | Ahy           | WP_011301866.1 |
| 294                   | <i>Magnetococcus_marinus</i>                         | Ahy           | WP_011713239.1 |
| 299                   | <i>Desulfitobacterium_hafniense</i>                  | Ahy           | WP_015943995.1 |
| 75                    | <i>Achromobacter_arsenitoxydans_SY8</i>              | AioA          | WP_008163524.1 |
| 76                    | <i>Herminiimonas_arsenicoxydans</i>                  | AioA          | WP_011870033.1 |
| 77                    | <i>Acidovorax_sp_NO_1</i>                            | AioA          | ADO32566.1     |
| 78                    | <i>Rhodoferrax_ferrireducens</i>                     | AioA          | WP_011465357.1 |
| 79                    | <i>Alcaligenes_faecalis</i>                          | AioA          | WP_003804071.1 |
| 80                    | <i>Thiomonas_arsenitoxydans</i>                      | AioA          | WP_013107016.1 |
| 81                    | <i>Ralstonia_sp_22</i>                               | AioA          | ACX69823.1     |
| 82                    | <i>Ochrobactrum_tritici</i>                          | AioA          | ACK38267.1     |
| 83                    | <i>Sinorhizobium_sp_M14</i>                          | AioA          | WP_015647692.1 |
| 84                    | <i>Xanthobacter_autotrophicus</i>                    | AioA          | WP_012115922.1 |
| 85                    | <i>Nitrobacter_hamburgensis</i>                      | AioA          | WP_011505135.1 |
| 86                    | <i>Pseudomonas_sp_S11</i>                            | AioA          | CBX43995.1     |

|     |                                             |           |                 |
|-----|---------------------------------------------|-----------|-----------------|
| 87  | <i>Pseudomonas_stutzeri</i> _TS44           | AioA      | WP_003291052.1  |
| 88  | <i>Halomonas_sp</i> _HAL1                   | AioA      | ACF77048.1      |
| 89  | <i>Nitrospira_defluvii</i>                  | AioA      | WP_013250203.1  |
| 90  | <i>Chloroflexus_aggregans</i>               | AioA      | WP_012615689.1  |
| 91  | <i>Thermus_thermophilus</i> _HB8            | AioA      | WP_011229171.1  |
| 92  | <i>Thermus_scotoductus</i>                  | AioA      | WP_015717354.1  |
| 93  | <i>Thermus_sp</i> _BXW                      | AioA      | ACI95250.1      |
| 94  | <i>Thermus_sp</i> _BXR                      | AioA      | ACI95251.1      |
| 95  | <i>Thermus_sp</i> _MKB                      | AioA      | ACI95253.1      |
| 96  | <i>Thermus_sp</i> _MKW                      | AioA      | ACI95252.1      |
| 97  | <i>Pyrobaculum_calidifontis</i> _JCM_11548  | AioA      | ABO08790.1      |
| 98  | <i>Aeropyrum_pernix</i> _K1                 | AioA      | BAA81573.2      |
| 99  | <i>Sulfolobus_tokodaii</i> _str_7           | AioA      | WP_010980475.1  |
| 233 | <i>Rhizobium_sp</i> _NT-26                  | AioA      | AAR05656.1      |
| 297 | <i>Chloroflexus</i>                         | AioA      | WP_012257094.1  |
| 339 | gene_2_ETNP_allDepths_AioA_contig_0         | AioA      | KY305109        |
| 193 | <i>Roseobacter_litoralis</i>                | AioA-Like | WP_013962104.1  |
| 194 | <i>Marinomonas_sp</i> _MED121               | AioA-Like | WP_009833997.1  |
| 195 | <i>Vibrio_sp</i> _MED222                    | AioA-Like | EAQ53648.1      |
| 196 | <i>Moritella_sp</i> _PE36                   | AioA-Like | WP_006033605.1  |
| 305 | <i>Halorubrum_sp</i> _AJ67                  | AioA-like | CDK40392.1      |
| 306 | <i>Halorubrum_kocurii</i>                   | AioA-like | WP_008847153.1  |
| 307 | <i>Halorubrum_tebenquichense</i>            | AioA-like | WP_006630729.1  |
| 308 | <i>Halobiforma_lacisalsi</i>                | AioA-like | WP_007141861.1  |
| 317 | gene_188_ETNP_BB2_100m_particle_NODE_258917 | AioA-Like | GCA_002896115.1 |
| 318 | gene_169_ETNP_BB2_100m_particle_NODE_273672 | AioA-Like | GCA_002896115.1 |
| 319 | gene_194_ETNP_BB2_120m_free_NODE_1224959    | AioA-Like | GCA_002896335.1 |

|     |                                             |           |                 |
|-----|---------------------------------------------|-----------|-----------------|
| 320 | gene_198_ETNP_BB2_120m_free_NODE_1328658    | AioA-Like | GCA_002896335.1 |
| 321 | gene_117_ETNP_BB2_120m_free_NODE_367591     | AioA-Like | GCA_002896335.1 |
| 322 | gene_2_ETNP_BB2_120m_free_NODE_3938         | AioA-Like | GCA_002896335.1 |
| 324 | gene_13_ETNP_BB2_120m_free_NODE_652617      | AioA-Like | GCA_002896335.1 |
| 325 | gene_8_ETNP_120m_NODE_148276                | AioA-Like | GCA_002896195.1 |
| 326 | gene_143_ETNP_120m_NODE_2008903             | AioA-Like | GCA_002896195.1 |
| 328 | gene_166_ETNP_120m_NODE_384418              | AioA-Like | GCA_002896195.1 |
| 329 | gene_110_ETNP_120m_NODE_578344              | AioA-Like | GCA_002896195.1 |
| 330 | gene_76_ETNP_120m_NODE_73101                | AioA-Like | GCA_002896195.1 |
| 331 | gene_126_ETNP_120m_NODE_883207              | AioA-Like | GCA_002896195.1 |
| 332 | gene_205_ETNP_BB2_120m_particle_NODE_118706 | AioA-Like | GCA_002896315.1 |
| 333 | gene_173_ETNP_BB2_120m_particle_NODE_380285 | AioA-Like | GCA_002896315.1 |
| 334 | gene_183_ETNP_140m_NODE_108852              | AioA-Like | GCA_002896255.1 |
| 335 | gene_17_ETNP_140m_NODE_57921                | AioA-Like | GCA_002896255.1 |
| 336 | Labrenzia alba                              | AioA-Like | WP_055674781.1  |
| 340 | gene_51_ETNP_allDepths_AioA-Like_contig_0   | AioA-Like | KY400105        |
| 343 | gene_116_ETNP_allDepths_AioA-Like_contig_4  | AioA-Like | KY400106        |
| 345 | gene_139_ETNP_allDepths_AioA-Like_contig_7  | AioA-Like | KY400107        |
| 346 | gene_165_ETNP_allDepths_AioA-Like_contig_14 | AioA-Like | KY400108        |
| 347 | gene_234_ETNP_allDepths_AioA-Like_contig_48 | AioA-Like | KY400109        |
| 105 | Shewanella_sp_W3_18_1                       | ArrA      | WP_011790217.1  |
| 106 | Shewanella_putrefaciens_200                 | ArrA      | WP_014610142.1  |
| 107 | Ferrimonas_balearica                        | ArrA      | WP_013345579.1  |
| 108 | Alkaliphilus_oremlandii                     | ArrA      | WP_012158954.1  |
| 109 | Alkaliphilus_metalliredigens                | ArrA      | WP_012062249.1  |
| 110 | Halarsenatibacter_silvermanii               | ArrA      | ACF74513.1      |
| 111 | Natranaerobius_thermophilus                 | ArrA      | WP_012447122.1  |

|     |                                                 |           |                |
|-----|-------------------------------------------------|-----------|----------------|
| 112 | <i>Desulfitobacterium_hafniense</i>             | ArrA      | WP_015943299.1 |
| 113 | <i>Wolinella_succinogenes</i>                   | ArrA      | WP_011138677.1 |
| 114 | <i>Sulfurospirillum_barnesii_SES_3</i>          | ArrA      | AAU11840.2     |
| 115 | <i>Desulfurispirillum_indicum</i>               | ArrA      | WP_013505023.1 |
| 116 | <i>Chrysiogenes_arsenatis_DSM_11915</i>         | ArrA      | AAU11839.1     |
| 117 | <i>Geobacter_lovleyi</i>                        | ArrA      | WP_012469220.1 |
| 118 | <i>Denitrovibrio_acetiphilus</i>                | ArrA      | WP_013011386.1 |
| 119 | <i>Bacillus_selenitireducens</i>                | ArrA      | WP_013173528.1 |
| 120 | <i>Anaerobacillus_arseniciselenatis</i>         | ArrA      | AAU11841.2     |
| 309 | <i>Halobiforma_nitratireducens</i>              | ArrA      | WP_006671188.1 |
| 310 | <i>Natronobacterium_gregoryi</i>                | ArrA      | WP_005576997.1 |
| 338 | gene_44_ETNP_allDepths_ArrA_contig_2            | ArrA      | KY305110       |
| 100 | <i>Alkalilimnicola_ehrlichii</i>                | ArxA      | WP_011627967.1 |
| 101 | <i>Halorhodospira_halophila</i>                 | ArxA      | WP_011813170.1 |
| 102 | <i>Ectothiorhodospira_sp_PHS_1</i>              | ArxA      | WP_008932021.1 |
| 103 | <i>Thioalkalivibrio_sp_ALM2T</i>                | ArxA      | WP_019593327.1 |
| 104 | <i>Halomonas_chromatireducens</i>               | ArxA      | AMD01645.1     |
| 16  | <i>Shewanella</i> sp MR-7                       | DmsA/TorA | WP_011624830.1 |
| 19  | <i>Roseobacter denitrificans</i> OCh 114        | DmsA/TorA | WP_011569751.1 |
| 22  | <i>Escherichia coli</i> str. K-12 substr. DH10B | DmsA/TorA | WP_000850303.1 |
| 23  | <i>Escherichia coli</i> str. K-12 substr. DH10B | DmsA/TorA | WP_001062091.1 |
| 28  | <i>Escherichia coli</i> str. K-12 substr. DH10B | DmsA/TorA | WP_001311208.1 |
| 32  | <i>Shewanella oneidensis</i> MR-1               | DmsA/TorA | NP_717049.1    |
| 33  | <i>Salmonella typhimurium</i> LT2               | DmsA/TorA | NP_459940.1    |
| 39  | <i>Salmonella typhimurium</i> LT2               | DmsA/TorA | NP_462545.1    |
| 40  | <i>Salmonella typhimurium</i> LT2               | DmsA/TorA | NP_462722.1    |
| 48  | <i>Bordetella petrii</i> DSM 12804              | DmsA/TorA | WP_012251054.1 |

|     |                                                 |           |                |
|-----|-------------------------------------------------|-----------|----------------|
| 207 | <i>Escherichia coli</i> _O157-H7_str_Sakai      | DmsA/TorA | BAB36807.1     |
| 222 | <i>Shewanella oneidensis</i> _MR-1              | DmsA/TorA | AAN57326.1     |
| 274 | <i>Symbiobacterium thermophilum</i>             | DmsA/TorA | WP_011194846.1 |
| 284 | <i>Moorella thermoacetica</i>                   | DmsA/TorA | WP_011392902.1 |
| 289 | <i>Desulfitobacterium hafniense</i>             | DmsA/TorA | WP_011462161.1 |
| 300 | <i>Desulfitobacterium hafniense</i>             | DmsA/TorA | WP_015945402.1 |
| 10  | <i>Alkalilimnicola ehrlichei</i> MLHE-1         | Fdh-H     | WP_011630246.1 |
| 14  | <i>Oligotropha carboxidovorans</i> OM5          | Fdh-H     | WP_012563839.1 |
| 15  | <i>Sulfolobus islandicus</i> M.14.25            | Fdh-H     | WP_012712405.1 |
| 21  | <i>Roseobacter denitrificans</i> OCh 114        | Fdh-H     | WP_011570280.1 |
| 30  | <i>Methylibium petroleiphilum</i> PM1           | Fdh-H     | WP_011827938.1 |
| 42  | <i>Salmonella typhimurium</i> LT2               | Fdh-H     | NP_463150.1    |
| 46  | <i>Bordetella petrii</i> DSM 12804              | Fdh-H     | WP_012250584.1 |
| 63  | <i>Sinorhizobium meliloti</i> 1021              | Fdh-H     | NP_387115.1    |
| 68  | <i>Rhizobium</i> sp. NGR234                     | Fdh-H     | YP_002827576.1 |
| 72  | <i>Burkholderia multivorans</i> ATCC 17616      | Fdh-H     | WP_012213900.1 |
| 6   | <i>Herminiimonas arsenicoxydans</i>             | Fdh-N     | WP_011870918.1 |
| 9   | <i>Bacillus selenitireducens</i> MLS10          | Fdh-N     | WP_041581796.1 |
| 11  | <i>Pyrobaculum aerophilum</i> str. IM2          | Fdh-N     | AAL64350.1     |
| 17  | <i>Roseobacter denitrificans</i> OCh 114        | Fdh-N     | WP_011569037.1 |
| 25  | <i>Escherichia coli</i> str. K-12 substr. DH10B | Fdh-N     | WP_010723100.1 |
| 29  | <i>Escherichia coli</i> str. K-12 substr. DH10B | Fdh-N     | ACB03442.1     |
| 41  | <i>Salmonella typhimurium</i> LT2               | Fdh-N     | NP_462917.1    |
| 49  | <i>Bordetella petrii</i> DSM 12804              | Fdh-N     | WP_012251487.1 |
| 51  | <i>Chromobacterium violaceum</i> ATCC 12472     | Fdh-N     | AAQ61501.1     |
| 70  | <i>Burkholderia multivorans</i> ATCC 17616      | Fdh-N     | WP_012217280.1 |
| 209 | <i>Pseudomonas aeruginosa</i> _PAO1             | MopB1     | NP_251404.1    |



|     |                                               |       |                |
|-----|-----------------------------------------------|-------|----------------|
| 244 | <i>Burkholderia mallei</i> ATCC 23344         | MopB1 | YP_103247.1    |
| 246 | <i>Nocardia farcinica</i> IFM 10152           | MopB1 | BAD55042.1     |
| 251 | <i>Ruegeria pomeroyi</i> DSS-3                | MopB1 | AAV95124.1     |
| 264 | <i>Mycobacterium tuberculosis</i>             | MopB1 | WP_010886070.1 |
| 271 | <i>Streptomyces avermitilis</i>               | MopB1 | WP_010987991.1 |
| 275 | <i>Nocardia farcinica</i>                     | MopB1 | WP_011209478.1 |
| 277 | <i>Pseudomonas syringae</i>                   | MopB1 | WP_011268725.1 |
| 286 | <i>Erythrobacter litoralis</i>                | MopB1 | WP_011414099.1 |
| 2   | <i>Veillonella parvula</i> DSM 2008           | MopB3 | WP_012864832.1 |
| 61  | <i>Sinorhizobium meliloti</i> 1021            | MopB3 | NP_385284.1    |
| 203 | <i>Deinococcus radiodurans</i> R1             | MopB3 | AAF09974.1     |
| 215 | <i>Ralstonia solanacearum</i> GMI1000         | MopB3 | CAD16566.1     |
| 243 | <i>Symbiobacterium thermophilum</i> IAM 14863 | MopB3 | BAD39503.1     |
| 250 | <i>Aromatoleum aromaticum</i> EbN1            | MopB3 | CAI08001.1     |
| 252 | <i>Ruegeria pomeroyi</i> DSS-4                | MopB3 | AAV96418.1     |
| 257 | <i>Bacillus</i>                               | MopB3 | WP_003182502.1 |
| 283 | <i>Moorella thermoacetica</i>                 | MopB3 | WP_011392757.1 |
| 3   | <i>Campylobacter concisus</i> 13826           | NapA  | WP_012001481.1 |
| 4   | <i>Sulfurovum</i> sp. NBC37-1                 | NapA  | WP_011979992.1 |
| 5   | <i>Deferribacter desulfuricans</i> SSM1       | NapA  | WP_013008520.1 |
| 20  | <i>Roseobacter denitrificans</i> OCh 114      | NapA  | WP_011570215.1 |
| 31  | <i>Shewanella oneidensis</i> MR-1             | NapA  | NP_716479.1    |
| 38  | <i>Salmonella typhimurium</i> LT2             | NapA  | NP_461202.1    |
| 45  | <i>Bordetella petrii</i> DSM 12804            | NapA  | CAP43981.1     |
| 47  | <i>Bordetella petrii</i> DSM 12804            | NapA  | WP_012250968.1 |
| 50  | <i>Chromobacterium violaceum</i> ATCC 12472   | NapA  | WP_011135776.1 |
| 52  | <i>Ralstonia solanacearum</i> GMI1000         | NapA  | WP_011004503.1 |

|     |                                                 |                     |                |
|-----|-------------------------------------------------|---------------------|----------------|
| 64  | <i>Sinorhizobium meliloti</i> 1021              | NapA                | NP_437651.1    |
| 65  | <i>Rhizobium</i> sp. NGR234                     | NapA                | YP_002823343.1 |
| 66  | <i>Rhizobium</i> sp. NGR234                     | NapA                | YP_002825545.1 |
| 69  | <i>Burkholderia multivorans</i> ATCC 17616      | NapA                | WP_012216933.1 |
| 73  | <i>Hahella chejuensis</i> KCTC 2396             | NapA                | WP_011397186.1 |
| 201 | <i>Clostridium perfringens</i>                  | NapA                | BAA74791.1     |
| 225 | <i>Streptomyces avermitilis</i> MA-4680         | NapA                | BAC70041.1     |
| 226 | <i>Rhodopirellula baltica</i> SH_1              | NapA                | CAD71546.1     |
| 281 | <i>Pseudomonas fluorescens</i>                  | NapA                | WP_011333254.1 |
| 282 | <i>Burkholderia lata</i>                        | NapA                | WP_011354950.1 |
| 26  | <i>Escherichia coli</i> str. K-12 substr. DH10B | NapA                | WP_000778061.1 |
| 59  | <i>Sinorhizobium meliloti</i> 1021              | NapA                | NP_435920.1    |
| 204 | <i>Pseudomonas putida</i>                       | NapA                | AAF74559.1     |
| 210 | <i>Aquifex aeolicus</i> VF5                     | NapA                | NP_213150.1    |
| 1   | <i>Veillonella parvula</i> DSM 2008             | NarG/SerA/EbdA/PcrA | WP_012863814.1 |
| 24  | <i>Escherichia coli</i> str. K-12 substr. DH10B | NarG/SerA/EbdA/PcrA | WP_000040458.1 |
| 35  | <i>Salmonella typhimurium</i> LT2               | NarG/SerA/EbdA/PcrA | NP_460536.1    |
| 36  | <i>Salmonella typhimurium</i> LT2               | NarG/SerA/EbdA/PcrA | NP_460720.1    |
| 74  | <i>Hahella chejuensis</i> KCTC 2396             | NarG/SerA/EbdA/PcrA | WP_011397795.1 |
| 134 | <i>Roseobacter denitrificans</i>                | NarG/SerA/EbdA/PcrA | WP_011568625.1 |
| 135 | <i>Oligotropha carboxidovorans</i>              | NarG/SerA/EbdA/PcrA | WP_012562208.1 |
| 140 | <i>Ralstoni pickettii</i>                       | NarG/SerA/EbdA/PcrA | WP_012436181.1 |
| 143 | <i>Rhodoferrax ferrireducens</i>                | NarG/SerA/EbdA/PcrA | WP_011465070.1 |
| 147 | <i>Herminiimonas arsenicoxydans</i>             | NarG/SerA/EbdA/PcrA | WP_011871147.1 |
| 153 | <i>Shewanella</i> sp. MR_7                      | NarG/SerA/EbdA/PcrA | WP_011626416.1 |
| 156 | <i>Pseudomonas stutzeri</i>                     | NarG/SerA/EbdA/PcrA | WP_013981797.1 |
| 161 | <i>Geobacillus</i> sp. WCH70                    | NarG/SerA/EbdA/PcrA | WP_015863792.1 |

|     |                                           |                     |                |
|-----|-------------------------------------------|---------------------|----------------|
| 163 | <i>Staphylococcus haemolyticus</i>        | NarG/SerA/EbdA/PcrA | WP_053027466.1 |
| 164 | <i>Staphylococcus aureus</i>              | NarG/SerA/EbdA/PcrA | WP_000514391.1 |
| 166 | <i>Kribbella flavida</i>                  | NarG/SerA/EbdA/PcrA | WP_012921751.1 |
| 168 | <i>Mycobacterium sp. JLS</i>              | NarG/SerA/EbdA/PcrA | WP_011854954.1 |
| 170 | <i>Pyrobaculum arsenaticum DSM_13514</i>  | NarG/SerA/EbdA/PcrA | ABP50094.1     |
| 171 | <i>Pyrobaculum calidifontis JCM_11548</i> | NarG/SerA/EbdA/PcrA | ABO09323.1     |
| 172 | <i>Sulfolobus islandicus M1425</i>        | NarG/SerA/EbdA/PcrA | WP_012710902.1 |
| 174 | <i>Aeropyrum pernix K1</i>                | NarG/SerA/EbdA/PcrA | BAA80279.2     |
| 175 | <i>Thauera selenatis</i>                  | NarG/SerA/EbdA/PcrA | Q9S1H0.1       |
| 208 | <i>Azoarcus sp. EB1</i>                   | NarG/SerA/EbdA/PcrA | AAK76387.1     |
| 212 | <i>Mycobacterium tuberculosis H37Rv</i>   | NarG/SerA/EbdA/PcrA | NP_215677.1    |
| 224 | <i>Dechloromonas agitata</i>              | NarG/SerA/EbdA/PcrA | AAO49008.1     |
| 234 | <i>Ideonella dechloratans</i>             | NarG/SerA/EbdA/PcrA | CAD97447.1     |
| 254 | <i>Thermus thermophilus HB8</i>           | NarG/SerA/EbdA/PcrA | CAA71210.2     |
| 261 | <i>Archaeoglobus fulgidus</i>             | NarG/SerA/EbdA/PcrA | WP_010877688.1 |
| 285 | <i>Moorella thermoacetica</i>             | NarG/SerA/EbdA/PcrA | WP_011393408.1 |
| 349 | <i>Carboxydotherrmus ferrireducens</i>    | NarG/SerA/EbdA/PcrA | WP_028051983.1 |
| 350 | <i>Geoglobus ahangari</i>                 | NarG/SerA/EbdA/PcrA | WP_048095430.1 |
| 351 | <i>Sedimenticola selenatireducens</i>     | NarG/SerA/EbdA/PcrA | WP_029133571.1 |
| 352 | <i>Dechloromonas sp. A34</i>              | NarG/SerA/EbdA/PcrA | ACV70151.1     |
| 353 | <i>Azospira oryzae</i>                    | NarG/SerA/EbdA/PcrA | WP_014235273.1 |
| 354 | <i>Dechlorosoma sp. KJ</i>                | NarG/SerA/EbdA/PcrA | ACB69917.1     |
| 7   | <i>Herminiimonas arsenicoxydans</i>       | NuoG/Nqo3           | CAL61975.1     |
| 12  | <i>Phenylobacterium zucineum HLK1</i>     | NuoG/Nqo3           | WP_012522351.1 |
| 13  | <i>Oligotropha carboxidovorans OM5</i>    | NuoG/Nqo3           | WP_012563077.1 |
| 18  | <i>Roseobacter denitrificans OCh 114</i>  | NuoG/Nqo3           | WP_011569395.1 |
| 43  | <i>Salmonella typhimurium LT2</i>         | NuoG/Nqo3           | NP_461265.2    |

|     |                                            |               |                |
|-----|--------------------------------------------|---------------|----------------|
| 44  | <i>Bordetella petrii</i> DSM 12804         | NuoG/Nqo3     | WP_012248606.1 |
| 60  | <i>Sinorhizobium meliloti</i> 1021         | NuoG/Nqo3     | NP_436074.1    |
| 62  | <i>Sinorhizobium meliloti</i> 1021         | NuoG/Nqo3     | NP_385378.1    |
| 67  | <i>Rhizobium</i> sp. NGR234                | NuoG/Nqo3     | YP_002826719.1 |
| 71  | <i>Burkholderia multivorans</i> ATCC 17616 | NuoG/Nqo3     | WP_012213012.1 |
| 206 | <i>Buchnera_aphidicola</i>                 | NuoG/Nqo3     | WP_010895977.1 |
| 223 | <i>Shewanella_oneidensis</i> MR-2          | NuoG/Nqo3     | NP_716644.1    |
| 235 | <i>Candidatus_Blochmannia_floridanus</i>   | NuoG/Nqo3     | CAD83177.1     |
| 236 | <i>Pseudomonas_aeruginosa</i>              | NuoG/Nqo3     | WP_003113377.1 |
| 239 | uncultured_marine_bacterium_463            | NuoG/Nqo3     | AAS07949.1     |
| 245 | <i>Methylococcus_capsulatus_str_Bath</i>   | NuoG/Nqo3     | AAU92580.1     |
| 258 | <i>Acinetobacter</i>                       | NuoG/Nqo3     | WP_004922513.1 |
| 278 | <i>Psychrobacter_arcticus</i>              | NuoG/Nqo3     | WP_011279878.1 |
| 302 | <i>Escherichia_coli</i>                    | NuoG/Nqo3     | KGM70396.1     |
| 355 | <i>Roseobacter denitrificans</i> NarH      | Outgroup/NarH | WP_011568626.1 |
| 218 | <i>Azoarcus_evansii</i>                    | PadB2         | CAD21686.1     |
| 259 | <i>Magnetospirillum magnetotacticum</i>    | PadB2         | WP_009869348.1 |
| 348 | <i>Aromatoleum_aromaticum</i>              | PadB2         | WP_011238861.1 |
| 121 | <i>Acidiphilium_cryptum</i>                | PsrA          | WP_011941465.1 |
| 123 | <i>Halorhodospira_halophila</i>            | PsrA          | WP_011813964.1 |
| 124 | <i>Alkalilimnicola_ehrlichii</i>           | PsrA          | WP_011628382.1 |
| 125 | <i>Wolinella_succinogenes</i>              | PsrA          | WP_011138081.1 |
| 126 | <i>Campylobacter_conciscus</i> 13826       | PsrA          | WP_012140134.1 |
| 127 | <i>Desulfovibrio_alaskensis</i>            | PsrA          | WP_011366771.1 |
| 128 | <i>Moorella_thermoacetica</i> ATCC_39073   | PsrA          | WP_011391988.1 |
| 129 | <i>Carboxydotherrmus_hydrogenoformans</i>  | PsrA          | WP_011345440.1 |
| 130 | <i>Thermus_multispecies</i>                | PsrA          | WP_011172610.1 |

|     |                                                                  |      |                |
|-----|------------------------------------------------------------------|------|----------------|
| 131 | <i>Pyrobaculum_aerophilum_str_IM2</i>                            | PsrA | AAL64489.1     |
| 132 | <i>Pyrobaculum_calidifontis_JCM_11548</i>                        | PsrA | ABO08919.1     |
| 133 | <i>Archaeoglobus_fulgidus_DSM_4304</i>                           | PsrA | WP_010879871.1 |
| 197 | <i>Wolinella_succinogenes</i>                                    | PsrA | CAA46176.1     |
| 220 | <i>Chlorobium_tepidum_TLS</i>                                    | PsrA | NP_661396.1    |
| 221 | <i>Acidianus_ambivalens</i>                                      | PsrA | CAC86937.1     |
| 267 | <i>Sulfolobus_solfataricus</i>                                   | PsrA | WP_010923481.1 |
| 34  | <i>Salmonella_typhimurium_LT2</i>                                | TtrA | NP_461010.1    |
| 176 | <i>Escherichia_coli</i>                                          | TtrA | WP_016236477.1 |
| 177 | <i>Wolinella_succinogenes</i>                                    | TtrA | WP_011138838.1 |
| 178 | <i>Dehalococcoides_mccartyi</i>                                  | TtrA | WP_011928749.1 |
| 179 | <i>Archaeoglobus_fulgidus_DSM_4304</i>                           | TtrA | WP_010877671.1 |
| 180 | <i>Pyrobaculum_arsenaticum_DSM_13514</i>                         | TtrA | ABP49991.1     |
| 181 | <i>Pyrobaculum_aerophilum_str_IM2</i>                            | TtrA | AAL63359.1     |
| 202 | <i>Aeropyrum_pernix_K1</i>                                       | TtrA | BAA81628.1     |
| 211 | <i>Aquifex_aeolicus_VF5</i>                                      | TtrA | NP_213844.1    |
| 213 | <i>Salmonella_enterica_subsp_enterica_serovar_Typhi_str_CT18</i> | TtrA | NP_456144.1    |
| 240 | <i>Photobacterium_profundum_SS9</i>                              | TtrA | CAG21876.1     |
| 241 | <i>Photobacterium_profundum_SS9</i>                              | TtrA | CAG23239.1     |
| 253 | <i>Ruegeria_pomeroyi_DSS-5</i>                                   | TtrA | AAV96784.1     |
| 260 | <i>Magnetospirillum_magnetotacticum</i>                          | TtrA | WP_009870642.1 |
| 266 | <i>Mesorhizobium_loti</i>                                        | TtrA | WP_010913367.1 |
| 268 | <i>Sulfolobus_solfataricus</i>                                   | TtrA | WP_010923973.1 |
| 269 | <i>Bordetella_parapertussis</i>                                  | TtrA | WP_010927818.1 |
| 290 | <i>Burkholderia_xenovorans</i>                                   | TtrA | WP_011491566.1 |
| 298 | <i>Histophilus_somni</i>                                         | TtrA | WP_012340525.1 |
| 304 | <i>Thiobacillus_denitrificans</i>                                | TtrA | WP_041432610.1 |

|     |                                  |      |                |
|-----|----------------------------------|------|----------------|
| 182 | Nitratiruptor_sp_SB155_2         | UnkA | WP_012081950.1 |
| 183 | Sulfurimonas_denitrificans       | UnkA | WP_011372134.1 |
| 184 | Aromatoleum_aromaticum           | UnkA | WP_011239455.1 |
| 185 | Dechloromonas_aromatica          | UnkA | WP_011288334.1 |
| 186 | Pyrobaculum_islandicum_DSM_4184  | UnkA | WP_011763710.1 |
| 187 | Rubrobacter_xylanophilus         | UnkA | WP_011564591.1 |
| 188 | Rhodococcus_jostii               | UnkA | WP_011600499.1 |
| 189 | Nocardioides_sp_JS614            | UnkA | WP_011756373.1 |
| 190 | Pelodictyon_luteolum             | UnkA | WP_011356795.1 |
| 191 | Chlorobium_phaeobacteroides      | UnkA | WP_011744030.1 |
| 192 | Chlorobium_chlorochromatii       | UnkA | WP_011362973.1 |
| 205 | Bacillus_halodurans_C-125        | YdeP | BAB06249.1     |
| 214 | Nostoc_sp_PCC_7120               | YdeP | BAB73018.1     |
| 217 | YdeP_Multispecies_Proteobacteria | YdeP | WP_000726691.1 |
| 227 | Rhodopirellula_baltica_SH_1      | YdeP | CAD75819.1     |
| 248 | Thermus_thermophilus_HB8_        | YdeP | YP_145436.1    |
| 291 | Burkholderia_xenovorans          | YdeP | WP_011493270.1 |
| 293 | Trichodesmium_erythraeum         | YdeP | WP_011610265.1 |
| 296 | Chloroflexus                     | YdeP | WP_012256094.1 |
| 303 | Rubrobacter_xylanophilus         | YdeP | WP_041328477.1 |

**Table S7.** Additional information for sequences used to construct the AioB tree (Fig. S5). The terminal number on sequence identifiers of the extant nodes of the tree are referred to as tree reference numbers. Accession & gi number correspond to the NCBI RefSeq database.

| Tree reference number | Organism                                      | Accession      |
|-----------------------|-----------------------------------------------|----------------|
| 1                     | <i>Chloroflexus aurantiacus</i> J-10-fl       | YP_001634828.1 |
| 2                     | <i>Sinorhizobium</i> sp. M14                  | WP_015647693.1 |
| 3                     | <i>Thiomonas arsenitoxydans</i>               | WP_013107017.1 |
| 4                     | <i>Pseudomonas stutzeri</i> TS44              | EIK51545.1     |
| 5                     | <i>Sulfolobus tokodaii</i>                    | WP_010980476.1 |
| 6                     | <i>Rhizobium</i> sp. NT-26                    | WP_052642469.1 |
| 7                     | <i>Thermus scotoductus</i>                    | KPD32962.1     |
| 42                    | <i>Thermus_thermophilus</i> _HB8              | WP_011229170.1 |
| 8                     | <i>Xanthobacter autotrophicus</i>             | WP_012115921.1 |
| 9                     | <i>Nitrobacter hamburgensis</i>               | WP_011505136.1 |
| 10                    | <i>Nitrospira defluvii</i>                    | WP_013250202.1 |
| 40                    | <i>Pyrobaculum calidifontis</i> _JCM_11548_40 | ABO08791.1     |
| 41                    | <i>Chloroflexus aggregans</i>                 | WP_012615690.1 |
| 11                    | <i>Roseobacter litoralis</i> Och 149          | AEI94179.1     |
| 12                    | <i>Vibrio</i>                                 | WP_009845422.1 |
| 44                    | <i>Marinomonas</i> _sp_MED121                 | EAQ65584.1     |
| 13                    | <i>Halorubrum kocurii</i>                     | WP_049911874.1 |
| 30                    | <i>Aeropyrum_ernix</i> _K1                    | BAA81580.1     |
| 31                    | <i>Halorubrum</i> _sp_AJ67                    | CDK40391.1     |
| 43                    | <i>Halobiforma lacisalsi</i>                  | WP_007141862.1 |
| 14                    | gene_1_AioA_ETNP_allDepths_contig_0           | KY305109       |

|    |                                             |                 |
|----|---------------------------------------------|-----------------|
| 15 | gene_3_ETNP_BB2_120m_free_NODE_3938         | GCA_002896335.1 |
| 16 | gene_9_ETNP_120m_NODE_148276                | GCA_002896195.1 |
| 17 | gene_77_ETNP_120m_NODE_73101                | GCA_002896195.1 |
| 18 | gene_111_ETNP_20m_NODE_578344               | GCA_002896195.1 |
| 20 | gene_127_ETNP_120m_NODE_883207              | GCA_002896195.1 |
| 21 | gene_144_ETNP_120m_NODE_2008903             | GCA_002896195.1 |
| 22 | gene_165_ETNP_120m_NODE_384418              | GCA_002896195.1 |
| 23 | gene_170_ETNP_BB2_100m_particle_NODE_273672 | GCA_002896115.1 |
| 26 | gene_184_ETNP_140m_NODE_108852              | GCA_002896255.1 |
| 28 | gene_197_ETNP_BB2_120m_free_NODE_1328658    | GCA_002896335.1 |
| 29 | gene_204_ETNP_BB2_120m_particle_NODE_118706 | GCA_002896315.1 |
| 32 | ArxB_Alkalimnicola_ehrlichii                | WP_041717854.1  |
| 34 | gene_52_ETNP_allDepths_AioA-Like_contig_0   | KY400105        |
| 39 | gene_163_ETNP_allDepths_AioA-Like_contig_14 | KY400108        |



**Table S8.** Additional information for sequences used to construct the DsrA tree (Fig. 5B and Fig. S7). The terminal number on sequence identifiers of the extant nodes of the tree are referred to as tree reference numbers. Accession & gi number correspond to the NCBI RefSeq database. Clade abbreviations: forward reductase bacterial DsrA = SRB; forward reductase archaeal DsrA = SRA; and reverse oxidizing bacterial DsrA = SOB.

| Tree reference number | Organism                                                                                                 | Clade    | Accession       |
|-----------------------|----------------------------------------------------------------------------------------------------------|----------|-----------------|
| 42                    | hydrogensulfite reductase [Moorella thermoacetica]                                                       | Moorella | WP_011393131.1  |
| 8                     | predicted siroheme sulfite reductase, alpha subunit [uncultured bacterium BAC13K9BAC]                    | SOB      | AAV89969.1      |
| 16                    | reverse-type dissimilatory sulfite reductase (rDSR), alpha subunit (DsrA) [uncultured bacterium ws156A7] | SOB      | AFI78494.1      |
| 17                    | reverse-type dissimilatory sulfite reductase (rDSR), alpha subunit (DsrA) [uncultured bacterium ws633F6] | SOB      | AFI78582.1      |
| 18                    | reverse-type dissimilatory sulfite reductase (rDSR), alpha subunit (DsrA) [uncultured bacterium ws085G8] | SOB      | AFI78678.1      |
| 20                    | DsrA [Thiocapsa roseopersicina]                                                                          | SOB      | AHW46446.1      |
| 29                    | dissimilatory sulfite reductase alpha subunit, partial [Prosthecochloris vibrioformis]                   | SOB      | BAJ17555.1      |
| 32                    | reverse dissimilatory sulfite reductase alpha subunit, partial [uncultured marine bacterium]             | SOB      | CAR92254.1      |
| 40                    | sulfite reductase, dissimilatory-type subunit alpha [Thiobacillus denitrificans]                         | SOB      | WP_011311821.1  |
| 43                    | sulfite reductase, dissimilatory-type subunit alpha [Alkalilimnicola ehrlichii]                          | SOB      | WP_011629393.1  |
| 44                    | sulfite reductase, dissimilatory-type subunit alpha [Candidatus Ruthia magnifica]                        | SOB      | WP_011738211.1  |
| 48                    | sulfite reductase, dissimilatory-type subunit alpha [Chlorobium phaeobacteroides]                        | SOB      | WP_012475251.1  |
| 49                    | sulfite reductase, dissimilatory-type subunit alpha [Chlorobaculum parvum]                               | SOB      | WP_012501291.1  |
| 59                    | sulfite reductase, dissimilatory-type subunit alpha [Curvibacter sp. PAE-UM]                             | SOB      | WP_057676684.1  |
| 60                    | ETNP_120m_free_PROKKA_259900_Sulfite_reductase_dissimilatorytype_subunit_alpha                           | SOB      | GCA_002896335.1 |
| 61                    | ETNP_120m_Part_PROKKA_215197_Sulfite_reductase_dissimilatorytype_subunit_alpha                           | SOB      | GCA_002896315.1 |
| 62                    | ETNP_120m_PROKKA_182735_Sulfite_reductase_dissimilatorytype_subunit_alpha                                | SOB      | GCA_002896195.1 |
| 63                    | ETNP_120m_PROKKA_244722_Sulfite_reductase_dissimilatorytype_subunit_alpha                                | SOB      | GCA_002896195.1 |

|    |                                                                                                     |     |                 |
|----|-----------------------------------------------------------------------------------------------------|-----|-----------------|
| 64 | ETNP_120m_PROKKA_256691_Sulfite_reductase_dissimilatorytype_subunit_alpha                           | SOB | GCA_002896195.1 |
| 65 | ETNP_120m_PROKKA_310660_Sulfite_reductase_dissimilatorytype_subunit_alpha                           | SOB | GCA_002896195.1 |
| 66 | ETNP_120m_PROKKA_342712_Sulfite_reductase_dissimilatorytype_subunit_alpha                           | SOB | GCA_002896195.1 |
| 67 | ETNP_140m_PROKKA_110356_Sulfite_reductase_dissimilatorytype_subunit_alpha                           | SOB | GCA_002896255.1 |
| 68 | ETNP_140m_PROKKA_42469_Sulfite_reductase_dissimilatorytype_subunit_alpha                            | SOB | GCA_002896255.1 |
| 69 | ETNP_160m_PROKKA_10268_Sulfite_reductase_dissimilatorytype_subunit_alpha                            | SOB | GCA_002896275.1 |
| 70 | ETNP_160m_PROKKA_52905_Sulfite_reductase_dissimilatorytype_subunit_alpha                            | SOB | GCA_002896275.1 |
| 71 | ETNP_180m_PROKKA_61989_Sulfite_reductase_dissimilatorytype_subunit_alpha                            | SOB | GCA_002896295.1 |
| 72 | ETNP_180m_PROKKA_92714_Sulfite_reductase_dissimilatorytype_subunit_alpha                            | SOB | GCA_002896295.1 |
| 73 | ETNP_300m_PROKKA_146002_Sulfite_reductase_dissimilatorytype_subunit_alpha                           | SOB | GCA_002896135.1 |
| 74 | ETNP_300m_PROKKA_37663_Sulfite_reductase_dissimilatorytype_subunit_alpha                            | SOB | GCA_002896135.1 |
| 75 | ETNP_300m_PROKKA_69995_Sulfite_reductase_dissimilatorytype_subunit_alpha                            | SOB | GCA_002896135.1 |
| 76 | ETNP_300m_PROKKA_79692_Sulfite_reductase_dissimilatorytype_subunit_alpha                            | SOB | GCA_002896135.1 |
| 45 | sulfite reductase, dissimilatory-type subunit alpha [Pyrobaculum islandicum]                        | SRA | WP_011761930.1  |
| 47 | hydrogensulfite reductase [Caldivirga maquilingensis]                                               | SRA | WP_012185907.1  |
| 58 | sulfite reductase, dissimilatory-type subunit alpha [Vulcanisaeta sp. JCM 14467]                    | SRA | WP_054849893.1  |
| 1  | dissimilatory sulfite reductase alpha subunit, partial [Desulfovibrio simplex]                      | SRB | AAB66716.1      |
| 2  | dissimilatory (bi-)sulfite reductase alpha subunit, partial [uncultured sulfate-reducing bacterium] | SRB | AAK61942.1      |
| 3  | dissimilatory sulfite reductase alpha subunit, partial [Syntrophobacter wolinii]                    | SRB | AAL57457.1      |
| 4  | dissimilatory (bi-)sulfite reductase subunit A, partial [uncultured sulfate-reducing bacterium]     | SRB | AAQ01277.1      |
| 5  | dissimilatory sulfite reductase subunit A, partial [uncultured sulfate-reducing bacterium]          | SRB | AAS87147.1      |
| 6  | dissimilatory sulfite reductase alpha subunit, partial [uncultured sulfate-reducing bacterium]      | SRB | AAT00420.1      |
| 7  | dissimilatory sulfite reductase alpha subunit, partial [uncultured sulfate-reducing bacterium]      | SRB | AAT00426.1      |
| 9  | DsrA, partial [uncultured sulfate-reducing bacterium]                                               | SRB | ACF16799.1      |
| 10 | dissimilatory sulfite reductase subunit A, partial [uncultured sulfate-reducing bacterium]          | SRB | ACJ11450.1      |
| 11 | dissimilatory sulfite reductase subunit A, partial [uncultured sulfate-reducing bacterium]          | SRB | ACJ11472.1      |
| 12 | dissimilatory sulfite reductase subunit A, partial [uncultured sulfate-reducing bacterium]          | SRB | ACJ11476.1      |

|    |                                                                                                |     |                 |
|----|------------------------------------------------------------------------------------------------|-----|-----------------|
| 13 | dissimilatory sulfite reductase alpha subunit, partial [uncultured sulfate-reducing bacterium] | SRB | ACN81698.1      |
| 14 | dissimilatory sulfite reductase alpha subunit, partial [uncultured sulfate-reducing bacterium] | SRB | ACN81702.1      |
| 15 | sulfite reductase, dissimilatory-type alpha subunit [Ammonifex degensii KC4]                   | SRB | ACX53171.1      |
| 19 | dissimilatory bisulfite reductase alpha subunit, partial [uncultured prokaryote]               | SRB | AFI98619.1      |
| 21 | dissimilatory sulfite reductase alpha subunit, partial [uncultured bacterium]                  | SRB | BAC06517.1      |
| 22 | dissimilatory sulfite reductase A, partial [uncultured bacterium]                              | SRB | BAC76054.1      |
| 23 | dissimilatory sulfite reductase alpha subunit, partial [uncultured sulfate-reducing bacterium] | SRB | BAD05870.1      |
| 24 | dissimilatory sulfite reductase alpha subunit, partial [uncultured sulfate-reducing bacterium] | SRB | BAD05892.1      |
| 25 | dissimilatory sulfite reductase alpha subunit, partial [uncultured sulfate-reducing bacterium] | SRB | BAE96467.1      |
| 26 | dissimilatory sulfite reductase alpha subunit, partial [uncultured sulfate-reducing bacterium] | SRB | BAE96515.1      |
| 27 | dissimilatory sulfite reductase alpha subunit, partial [Archaeoglobus infectus DSM 18877]      | SRB | BAF64848.1      |
| 28 | dissimilatory sulfite reductase subunit A, partial [uncultured bacterium]                      | SRB | BAG68270.1      |
| 30 | dissimilatory sulfite reductase subunit A, partial [uncultured sulfate-reducing bacterium]     | SRB | CAQ77318.1      |
| 31 | dissimilatory sulfite reductase alpha subunit, partial [uncultured sulfate-reducing bacterium] | SRB | CAR81701.1      |
| 34 | sulfite reductase, dissimilatory-type subunit alpha [Acetonema longum]                         | SRB | WP_004092271.1  |
| 35 | sulfite reductase, dissimilatory-type subunit alpha [Desulfitobacterium hafniense]             | SRB | WP_005810505.1  |
| 37 | sulfite reductase [Archaeoglobus fulgidus]                                                     | SRB | WP_010877930.1  |
| 38 | sulfite reductase subunit alpha [Desulfovibrio vulgaris]                                       | SRB | WP_010937709.1  |
| 39 | sulfite reductase, dissimilatory-type subunit alpha [Desulfotalea psychrophila]                | SRB | WP_011188042.1  |
| 46 | sulfite reductase, dissimilatory-type subunit alpha [Desulfotomaculum reducens]                | SRB | WP_011879477.1  |
| 50 | sulfite reductase, dissimilatory-type subunit alpha [Desulfovibrio desulfuricans]              | SRB | WP_012624553.1  |
| 51 | sulfite reductase, dissimilatory-type subunit alpha [Desulfomicrobium baculatum]               | SRB | WP_012805491.1  |
| 52 | sulfite reductase, dissimilatory-type subunit alpha [Archaeoglobus veneficus]                  | SRB | WP_013684596.1  |
| 53 | sulfite reductase, dissimilatory-type subunit alpha [Thermodesulfovibrium narugense]           | SRB | WP_013756705.1  |
| 54 | sulfite reductase, dissimilatory-type subunit alpha [Desulfosporosinus meridiei]               | SRB | WP_014903396.1  |
| 55 | MULTISPECIES: sulfite reductase, dissimilatory-type subunit alpha [Desulfatibacillum]          | SRB | WP_015949027.1  |
| 77 | ETNP_90m_PROKKA_129469_Sulfite_reductase_dissimilatorytype_subunit_alpha                       | SRB | GCA_002896175.1 |

## References for SI citations

1. Tiano L, *et al.* (2014) Oxygen distribution and aerobic respiration in the north and south eastern tropical Pacific oxygen minimum zones. *Deep Sea Research Part I* 94:173-183.
2. Devol AH (2013) Physical, chemical and biological CTD and bottle data from R/V Thomas G. Thompson cruise TN278 in eastern tropical North Pacific Ocean. (National Oceanographic Data Center, NOAA).
3. Glasser NR, Oyala PH, Osborne TH, Santini JM, & Newman DK (2018) Structural and mechanistic analysis of the arsenate respiratory reductase provides insight into environmental arsenic transformations. *Proceedings of the National Academy of Sciences*.
4. Garcia H, *et al.* (2014) World Ocean Atlas 2013, volume 4: Dissolved inorganic nutrients (phosphate, nitrate, silicate). *NOAA Atlas NESDIS* 76:25.
5. Sunagawa S, *et al.* (2015) Structure and function of the global ocean microbiome. *Science* 348(6237).
6. Dupont CL, *et al.* (2014) Functional Tradeoffs Underpin Salinity-Driven Divergence in Microbial Community Composition. *PLoS One* 9(2):e89549.
7. Allen LZ, *et al.* (2012) Influence of nutrients and currents on the genomic composition of microbes across an upwelling mosaic. *The ISME Journal* 6(7):1403-1414.
8. Ganesh S, *et al.* (2015) Size-fraction partitioning of community gene transcription and nitrogen metabolism in a marine oxygen minimum zone. *ISME J* 9(12):2682-2696.
9. Stewart FJ, Ulloa O, & DeLong EF (2012) Microbial metatranscriptomics in a permanent marine oxygen minimum zone. *Environ Microbiol* 14(1):23-40.
10. Schunck H, *et al.* (2013) Giant Hydrogen Sulfide Plume in the Oxygen Minimum Zone off Peru Supports Chemolithoautotrophy. *PLoS One* 8(8):e68661.
